# Supplementary material for: A chemiluminescent probe for cellular peroxynitrite using a self-immolative oxidative decarbonylation reaction
Source: Royal Society of Chemistry journal article supplement (doi:10.1039/c7sc05087a), 2018-01-01

## Supporting Information:

# A Chemiluminescent Probe for Cellular Peroxynitrite Using an Oxidative Decarboxylation Reaction

Jian Cao,<sup>†,§</sup> Weiwei An,<sup>†,§</sup> Audrey G. Reeves,<sup>†</sup> and Alexander R. Lippert\*,<sup>†,§,¶</sup>

<sup>†</sup>Department of Chemistry, <sup>§</sup>Center for Drug Discovery, Design, and Delivery (CD4), and <sup>¶</sup>Center for Global Health Impact (CGHI), Southern Methodist University, Dallas, TX, 75275-0314.

| Table of contents Pages                                                              | Pages |
|--------------------------------------------------------------------------------------|-------|
| 1. General methods for chemical synthesis                                            | S2    |
| 2. Preparation of ONOO <sup>-</sup>                                                  | S4    |
| 3. GC-MS <b>experiment</b> to monitor reaction intermediates                         | S4    |
| 4. Chemiluminescence response                                                        | S5    |
| 5. Determination of the detection limit of bolus ONOO <sup>-</sup>                   | S6    |
| 6. Selectivity tests                                                                 | S7    |
| 7. Synthesis of <b>XF1</b>                                                           | S8    |
| 8. <b>XF1</b> response and selectivity tests                                         | S9    |
| 9. Inhibition <b>experiments</b> with HCO <sub>3</sub> <sup>-</sup> and TEMPOL       | S10   |
| 10. Inhibition <b>experiments</b> from HCO <sub>3</sub> <sup>-</sup> and glutathione | S10   |
| 11. Cell culture                                                                     | S11   |
| 12. MTT assay                                                                        | S12   |
| 13. Cellular internalization of <b>PNCL</b>                                          | S13   |
| 14. Detection of SIN-1 generated ONOO <sup>-</sup> in macrophages                    | S13   |
| 15. Application of <b>PNCL</b> for detecting endogenous ONOO <sup>-</sup>            | S15   |
| 16. iNOS inhibit the production of ONOO <sup>-</sup> in macrophages                  | S15   |
| 17. <sup>1</sup> H and <sup>13</sup> C NMR Spectra                                   | S17   |

**1. General Methods for Chemical Synthesis.** All reactions were performed in dried glassware under an atmosphere of dry N<sub>2</sub>. Silica gel P60 (SiliCycle) was used for column chromatography

and SiliCycle 60 F254 silica gel (precoated sheets, 0.25 mm thick) was used for analytical thin layer chromatography. Plates were visualized by fluorescence quenching under UV light or by staining with iodine. Other reagents were purchased from Sigma-Aldrich (St. Louis, MO), Alfa Aesar (Ward Hill, MA), EMD Millipore (Billerica, MA), Oakwood Chemical (West Columbia, SC), and Cayman Chemical (Ann Arbor, MI) and used without further purification.  $^1\text{H}$  NMR and  $^{13}\text{C}$  NMR spectra for characterization of new compounds and monitoring reactions were collected in  $\text{CDCl}_3$  (Cambridge Isotope Laboratories, Cambridge, MA) on a JEOL 500 MHz spectrometer in the Department of Chemistry at Southern Methodist University. All chemical shifts are reported in the standard notation of parts per million using the peak of residual proton signals of the deuterated solvent as an internal reference. Coupling constant units are in Hertz (Hz) Splitting patterns are indicated as follows: br, broad; s, singlet; d, doublet; t, triplet; q, quartet; m, multiplet; dd, doublet of doublets; dt, doublet of triplets. High-resolution mass spectroscopy was performed on a Shimadzu IT-TOF (ESI source) at the Shimadzu Center for Advanced Analytical Chemistry at the University of Texas, Arlington and Matrix-assisted desorption/ionization (MALDI) mass spectrometry was performed at the University of Texas, Dallas.

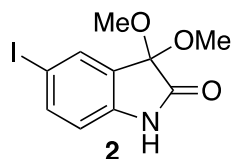

**5-iodo-3,3-dimethoxyindolin-2-one (2).** 5-iodoisatin (203.1 mg, 7.43 mmol, 1.0 equiv) was dissolved in 300 mL MeOH, followed directly by the addition of 7.1 mL HCl. The reaction was stirred for 48 h at rt. The reaction mixture was neutralized with saturated  $\text{NaHCO}_3$ , and then the reaction mixture was poured into a separatory funnel containing 150 mL  $\text{H}_2\text{O}$ , and extracted with 3 x 100 mL EtOAc. The organic layer was washed with 10 mL brine, dried over  $\text{Na}_2\text{SO}_4$ , filtered, and concentrated. Purification by silica column chromatography (1:4 EtOAc/hexanes) afforded **2** (2.2 g, 93%) as a colorless solid.  $^1\text{H}$  NMR (500 MHz,  $\text{CDCl}_3$ )  $\delta$  9.46 (s, 1H), 7.65 (d, 1H,  $J = 1.7$  Hz), 7.58 (dd, 1H,  $J = 8.0, 1.7$  Hz), 6.70 (d, 1H,  $J = 8.0$  Hz), 3.53 (s, 6H);  $^{13}\text{C}$  NMR (125 MHz,  $\text{CDCl}_3$ )  $\delta$  173.02, 140.40, 139.61, 133.84, 127.42, 113.36, 97.42, 85.43, 51.08. HRMS calcd for  $\text{C}_{10}\text{H}_{10}\text{INO}_3$  (M-H) 317.9633, found 317.9638.

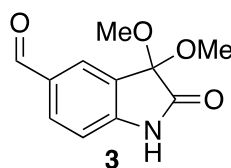

**3,3-dimethoxy-2-oxoindoline-5-carbaldehyde (3).** Compound **2** (607.0 mg, 1.90 mmol, 1.0 equiv), *N*-formyl saccharin (602.8 mg, 2.86 mmol, 1.5 equiv), palladium(II) acetate (12.8 mg, 0.057 mmol, 0.03 equiv), 1,4-bis(diphenylphosphino)butane (36.5 mg, 0.086 mmol, 0.045 equiv), and  $\text{Na}_2\text{CO}_3$  (302.3 mg, 2.86 mmol, 1.5 equiv) were added to a 10 mL pressure flask. The flask was evacuated and backfilled with  $\text{N}_2$  three times. Then, a degassed solution of  $\text{Et}_3\text{SiH}$  (395  $\mu\text{L}$ , 2.47 mmol, 1.3 equiv) and anhydrous DMF (2 mL) were added to the flask under  $\text{N}_2$ . The pressure flask was sealed immediately and the mixture was stirred for 10 min at rt. Then the mixture was warmed to 80  $^\circ\text{C}$  and stirred for 16 h. The reaction was quenched with 100 mL saturated  $\text{NH}_4\text{Cl}$ , extracted with 3 x 80 mL EtOAc, washed with 10 mL brine, dried over  $\text{Na}_2\text{SO}_4$ , filtered, and concentrated. The crude was purified by the silica column chromatography (1:3 EtOAc/hexanes) to deliver compound **4** as a white solid (245.0 mg, 59%).  $^1\text{H}$  NMR (500 MHz,  $\text{CDCl}_3$ )  $\delta$  9.90 (s,

1H), 9.33 (s, 1H), 7.93 (d, 1H,  $J = 1.7$  Hz), 7.87 (dd, 1H,  $J = 8.0, 1.7$  Hz), 7.07 (d, 1H,  $J = 8.0$  Hz), 3.59 (s, 6H);  $^{13}\text{C}$  NMR (125 MHz,  $\text{CDCl}_3$ )  $\delta$  190.81, 173.33, 146.20, 134.69, 131.82, 126.25, 125.85, 111.36, 96.60, 51.02. HRMS calcd for  $\text{C}_{11}\text{H}_{11}\text{NO}_4$  ( $\text{M}-\text{H}^-$ ) 220.0615, found 220.0609.

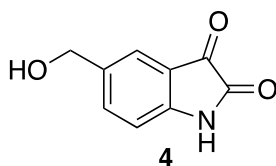

**5-(hydroxymethyl)indoline-2,3-dione (4).** Compound **3** (160.0 mg, 0.72 mmol, 1.0 equiv) and sodium borohydride (41.9 mg, 1.11 mmol, 1.53 equiv) were dissolved in 12 mL EtOH, and the mixture was stirred at rt for 1 h. The reaction was quenched with 80 mL saturated  $\text{NH}_4\text{Cl}$ , extracted with 3 x 40 mL EtOAc, washed with 10 mL brine, dried over  $\text{Na}_2\text{SO}_4$ , filtered, and concentrated to yield 5-(hydroxymethyl)-3,3-dimethoxyindolin-2-one (162 mg) as a colorless oil and used without further purification.  $^1\text{H}$  NMR (500 MHz,  $\text{CDCl}_3$ )  $\delta$  9.05 (s, 1H), 7.39 (s, 1H), 7.24 (d, 1H,  $J = 8.0$  Hz), 6.79 (d, 1H,  $J = 8.0$  Hz), 4.61 (s, 2H), 3.53 (s, 6H);  $^{13}\text{C}$  NMR (125 MHz,  $\text{CDCl}_3$ )  $\delta$  173.33, 140.14, 135.67, 129.81, 125.43, 124.28, 111.05, 97.41, 64.88, 50.95. HRMS calcd for  $\text{C}_{11}\text{H}_{13}\text{NO}_4$  ( $\text{M}-\text{H}^-$ ) 222.0772, found 222.0778. 5-(hydroxymethyl)-3,3-dimethoxyindolin-2-one (189 mg, 0.85 mmol, 1.0 equiv) was dissolved in 12 mL 1 M HCl solution, and the reaction was stirred at rt for 30 min. The reaction was neutralized with saturated  $\text{NaHCO}_3$ , and then the reaction mixture was poured into a separatory funnel, and extracted with 3 x 40 mL 3:1 DCM: iPrOH and 3 x 30 mL EtOAc. The organic layer was washed with 10 mL brine, dried over  $\text{Na}_2\text{SO}_4$ , filtered, and concentrated. Purification by silica column chromatography (1:1 to 2:1 EtOAc/hexanes) afforded **4** (132.0 mg, 88%) as an orange solid.  $^1\text{H}$  NMR (500 MHz,  $(\text{CD}_3)_2\text{CO}$ )  $\delta$  7.58 (d, 1H,  $J = 8.0$  Hz), 7.50 (dd, 1H,  $J = 8.0, 1.7$  Hz), 6.96 (d, 1H, 1.7 Hz), 4.57 (s, 2H);  $^{13}\text{C}$  NMR (125 MHz,  $(\text{CD}_3)_2\text{CO}$ )  $\delta$  184.09, 159.14, 149.60, 137.82, 136.77, 122.77, 118.10, 112.00, 62.81. HRMS calcd for  $\text{C}_9\text{H}_7\text{NO}_3$  ( $\text{M}-\text{H}^-$ ) 176.0353, found 176.0345.

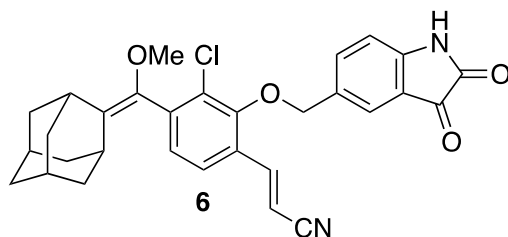

**(E)-3-(4-(((1r,3r,5R,7S)-adamantan-2-ylidene)(methoxy)methyl)-3-chloro-2-((2,3-dioxindolin-5-yl)methoxy)phenyl)acrylonitrile (6).** Compound **4** (20 mg, 0.11 mmol, 1.0 equiv), compound **5**<sup>1</sup> (43.8 mg, 0.11, 1.0 equiv), and triphenylphosphine (36.0 mg, 0.13 mmol, 1.2 equiv) were dissolved in 2 mL anhydrous THF, and the reaction mixture was cooled to 0 °C. Diethyl azodicarboxylate (21.3  $\mu\text{L}$ , 0.14 mmol, 1.2 equiv) was added dropwise over 5 min. After 1 h of stirring at rt, the mixture was concentrated. Purification by silica column chromatography (2% MeOH/DCM) afforded **6** as a yellow oil (49.0 mg, 84%).  $^1\text{H}$  NMR (500 MHz,  $\text{CDCl}_3$ )  $\delta$  8.56 (s, 1H), 7.71 (dd, 1H,  $J = 8.0, 1.7$  Hz), 7.64 (d, 1H,  $J = 1.7$  Hz), 7.50 (d, 1H,  $J = 16.8$  Hz), 7.12 (d, 1H,  $J = 8.0$  Hz), 7.02 (d, 1H,  $J = 8.0$  Hz), 5.90 (d, 1H,  $J = 16.8$  Hz), 4.98 (m, 2H), 3.32 (s, 3H), 3.27 (s, 1H), 1.64-2.20 (m, 13 H);  $^{13}\text{C}$  NMR (125 MHz,  $\text{CDCl}_3$ )  $\delta$  182.76, 159.24, 152.97, 149.62,

1. O. Green, T. Eilon, N. Hananya, S. Gutkin, C. R. Bauer and D. Shabat, *ACS Cent. Sci.* 2017, **3**, 349.

144.73, 139.66, 139.05, 133.50, 131.91, 129.98, 128.40, 125.88, 124.59, 118.24, 117.98, 112.85, 98.63, 75.11, 57.56, 39.27, 39.12, 38.73, 37.05, 33.11, 29.85, 29.36, 28.38, 28.21. HRMS calcd for C<sub>30</sub>H<sub>27</sub>ClN<sub>2</sub>O<sub>4</sub> (M-H<sup>-</sup>) 513.1587, found 513.1595.

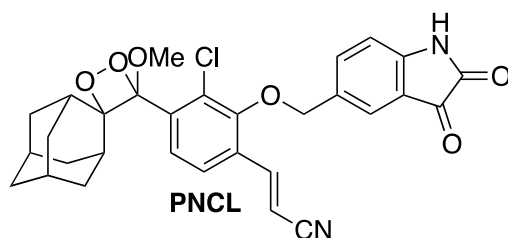

**(E)-3-(3-chloro-2-((2,3-dioxindolin-5-yl)methoxy)-4-((1r,3r,5r,7r)-4'-methoxyspiro[adamantane-2,3'-[1,2]dioxetan]-4'-yl)phenyl)acrylonitrile (PNCL).** Enol ether **6** (40.0 mg, 0.075 mmol, 1.0 equiv) and Rose bengal (9.8 mg, 0.010 mmol, 0.13 equiv) were added into a dry flask and dissolved in 5 mL THF. Oxygen was bubbled through the reaction mixture, while irradiating with a 120 W light bulb (Home Depot, Dallas, TX) at 0 °C. After 3 h of reaction, TLC showed no starting material left and the mixture was then concentrated under vacuum at 0 °C and the residue was purified by the silica column chromatography (10:1 DCM/Ether) to deliver PNCL (33.0 mg, 81%) as a yellow solid. <sup>1</sup>H NMR (500 MHz, CDCl<sub>3</sub>) δ 9.02 (s, 1H), 7.97 (d, 1H, *J* = 8.6 Hz), 7.66-7.70 (m, 2H), 7.25-7.52 (m, 2H), 7.12 (d, 1H, *J* = 8.0 Hz), 7.04 (d, 1H, *J* = 8.0 Hz), 5.96 (d, 1H, *J* = 16.6 Hz), 4.90 (s, 2H), 3.22 (s, 3H), 3.02 (s, 1H), 1.24-2.20 (m, 13H); <sup>13</sup>C NMR (125 MHz, CDCl<sub>3</sub>) δ 182.77, 159.21, 153.45, 149.72, 144.23, 138.94, 136.76, 131.60, 120.50, 129.62, 125.86, 124.77, 118.30, 117.65, 112.92, 111.63, 100.03, 96.49, 75.26, 49.87, 36.58, 33.98, 33.72, 32.79, 32.23, 31.64, 31.05, 29.79, 26.18, 25.87. MALDI-MS calcd for C<sub>30</sub>H<sub>27</sub>ClN<sub>2</sub>O<sub>6</sub> (M+H<sup>+</sup>) 547.16, found 547.15.

**2. Preparation of ONOO<sup>-2</sup>** To a 200 mL round flask was added 2.2 mL of 11.6 M H<sub>2</sub>O<sub>2</sub> (26.0 mmol) further diluted with 50 mL DI-H<sub>2</sub>O. The mixture was allowed to chill to 0 °C before addition of 36 mL of 0.55 M NaOH followed by 5 mL of 0.04 M EDTA. The final mixture was diluted to a total volume of 100 mL with DI-H<sub>2</sub>O before the addition of 3.4 mL isopentyl nitrite (26.0 mmol). A deep, yellow color indicates the formation of peroxyxynitrite. After 6 hours of stirring at 0 °C, the mixture was washed 3 x 20 mL with DCM. To the aqueous layer was added roughly 20 mg of MnO<sub>2</sub>. The mixture was allowed to stir until bubbling ceased, upon which it was filtered twice and stored on ice or in the freezer. The concentration was determined using an extinction coefficient of ε = 1670 M<sup>-1</sup> cm<sup>-1</sup> at 302 nm.

### 3. GC-MS procedure to monitor reaction intermediates

300 μL of 10 mM PNCL in DMSO (3 mM final concentration), and 125 μL of 48 mM ONOO<sup>-</sup> (6 mM final concentration) were mixed in an Eppendorf tube, and vortexed for 5 second. The reaction mixture was then poured into a separatory funnel containing 10 mL EtOAc and 15 mL DI-H<sub>2</sub>O and extracted with 2 x 10 mL EtOAc. The organic layer was collected, dried over Na<sub>2</sub>SO<sub>4</sub>, filtered, and concentrated. Then the solid was re-dissolved in 2 mL CH<sub>2</sub>Cl<sub>2</sub>, transferred to a GC-MS vial and GC-MS was conducted immediately.

---

2. R. M. Uppu and W. A. Pryor, *Anal. Biochem.* 1996, **236**, 242.

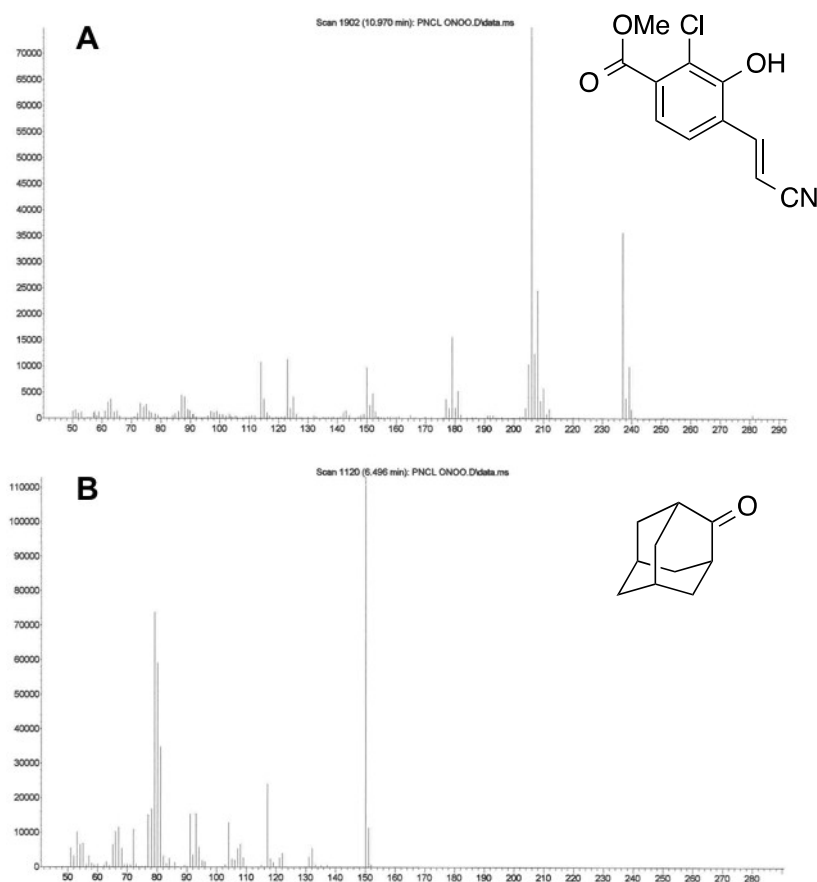

**Figure S1.** The reaction products were observed between **PNCL** and  $\text{ONOO}^-$  by GC-MS. (A)  $m/z=237$ , (B)  $m/z=150.1$ .

**4. Chemiluminescent response.** Chemiluminescent responses and time scans were acquired with a Hitachi F-7000 Fluorescence Spectrophotometer (Hitachi, Tokyo, Japan) using the luminescence detection module. 20 mM HEPES buffer (pH 7.4), 5 mM **PNCL** stock solution in DMSO and  $\text{ONOO}^-$  were added to a quartz cuvette (Starna, Atascadero, CA) in sequences. Samples were shaken gently to assure mixing. 20  $\mu\text{M}$  **PNCL** was treated with 0, 5, 10, 20, 40, 80, 100 and 200  $\mu\text{M}$   $\text{ONOO}^-$ . Time scans were acquired using the time scan module by setting the emission wavelength to 525 nm. Wavelength scans were acquired by treating 20  $\mu\text{M}$  **PNCL** with 0  $\mu\text{M}$  to 200  $\mu\text{M}$   $\text{ONOO}^-$ . Time scans and wavelength scans were measured 10 second after adding  $\text{ONOO}^-$ .

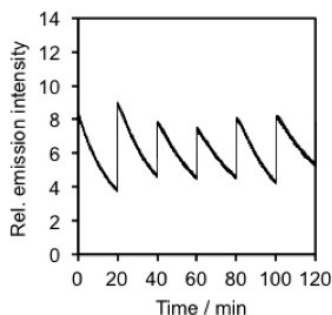

**Figure S2.** Repeatability of chemiluminescence response. Time course of the chemiluminescence emission at 525 nm of 20  $\mu\text{M}$  **PNCL** and 200  $\mu\text{M}$   $\text{ONOO}^-$  in 20 mM HEPES (pH 7.4). Every 20 min, an additional 200  $\mu\text{M}$   $\text{ONOO}^-$  was added to the solution.

### 5. Determination of the detection limit of bolus $\text{ONOO}^-$

Chemiluminescent responses were measured using a Cytation 5 BioTek plate reader (Winooski, VT) by using the luminescence detection method, endpoint read type, and setting gain to 135 and temperature to 37 °C. 0.125 mM, 0.25 mM, 0.5 mM, 0.75 mM  $\text{ONOO}^-$  stock solutions were made by dilution of a 16 mM  $\text{ONOO}^-$  solution with 0.01 M NaOH, and the final concentration was also confirmed by UV/Vis. 249  $\mu\text{L}$  of 10 mM PBS buffer (pH 7.4) was added into vehicle well, and 248  $\mu\text{L}$  of 20 mM HEPES buffer (pH 7.4) was added into other wells. 1  $\mu\text{L}$  of 5 mM **PNCL** was pipetted into every well, and then 1  $\mu\text{L}$  of different concentrated  $\text{ONOO}^-$  stock solutions were added into wells. The chemiluminescence emission was then measured on the plate reader. The emission was integrated over 30 minutes and the calibration curve was constructed using three replicate experiments. The detection limit was determined as  $\text{LoD} = 3\sigma/k$ .

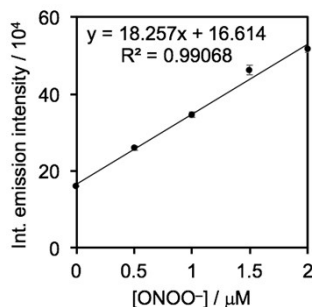

**Figure S3.** Detection Limit of **PNCL** for bolus  $\text{ONOO}^-$ . Integrated chemiluminescence emission intensity of 20  $\mu\text{M}$  **PNCL** and 0  $\mu\text{M}$ , 0.5  $\mu\text{M}$ , 1  $\mu\text{M}$ , 1.5  $\mu\text{M}$ , and 2  $\mu\text{M}$  of  $\text{ONOO}^-$ .

**Table S1. Detection limits of selected fluorescent and chemiluminescent ONOO<sup>-</sup> probes.**

| Reference | Method            | LoD      |
|-----------|-------------------|----------|
| 3         | Fluorescence      | 2.5 μM   |
| 4         | Fluorescence      | 0.917 μM |
| 5         | Chemiluminescence | 0.1 μM   |
| 6         | Fluorescence      | 50 nM    |
| 7         | Fluorescence      | 35 nM    |
| 8         | Fluorescence      | 10 nM    |
| this work | Chemiluminescence | 6 nM     |
| 9         | Chemiluminescence | 5 nM     |
| 10        | Fluorescence      | 4 nM     |

## 6. Selectivity tests

Selectivity for **PNCL** was measured by monitoring the time-dependent chemiluminescent emission at 525 nm with an F-7000 fluorescence spectrophotometer (Hitachi, Tokyo, Japan). All assays were performed in 20 mM HEPES buffered to pH 7.42. All analytes were tested with final concentration of 200 μM, with the exceptions of glutathione (5 mM), and L-cysteine (1 mM).

**ONOO<sup>-</sup> (200 μM)**: 3.1 μL of 65 mM ONOO<sup>-</sup> was added to a solution of 993 μL HEPES buffer and then 4 μL of 5 mM **PNCL** in DMSO was added to the mixture.

**S<sub>2</sub>O<sub>3</sub><sup>2-</sup> (200 μM)**: 4 μL of 50 mM Na<sub>2</sub>S<sub>2</sub>O<sub>3</sub> in DI-H<sub>2</sub>O was added to a solution of 992 μL HEPES buffer and then 4 μL of 5 mM **PNCL** in DMSO was added to the mixture.

**<sup>t</sup>BuOOH (200 μM)**: 4 μL of 50 mM <sup>t</sup>BuOOH in DI-H<sub>2</sub>O was added to a solution of 992 μL HEPES buffer and then 4 μL of 5 mM **PNCL** in DMSO was added to the mixture.

**S-nitrosoglutathione (200 μM)**: 20 μL of 10 mM S-nitrosoglutathione in DI-H<sub>2</sub>O was added to a solution of 976 μL HEPES buffer and then 4 μL of 5 mM **PNCL** in DMSO was added to the mixture.

**Glutathione (5 mM)**: 20 μL of 250 mM glutathione in DI-H<sub>2</sub>O was added to a solution of 976 μL HEPES buffer and then 4 μL of 5 mM **PNCL** in DMSO was added to the mixture.

**L-Cysteine (1 mM)**: 4 μL of 250 mM cysteine in DI-H<sub>2</sub>O was added to a solution of 992 μL HEPES buffer and then 4 μL of 5 mM **PNCL** in DMSO was added to the mixture.

---

3. J. Kim, J. Park, H. Lee, Y. Choi and Y. Kim, *Chem. Comm.* 2014, **50**, 9353.

4. F. Yu, P. Li, B. Wang, and K. Han, *J. Am. Chem. Soc.* 2013, **135**, 7674.

5. W. Zhou, Y. Cao, D. Sui and C. Lu, *Anal. Chem.* 2016, **88**, 2659.

6. T. Peng and D. Yang, *Org. Lett.* 2010, **12**, 4932.

7. J. Li, C. S. Lim, G. Kim, H. M. Kim and J. Yoon, *Anal. Chem.* 2017, **89**, 8496.

8. T. Peng, N. K. Wong, X. Chen, Y. K. Chan, D. H. H. Ho, Z. Sun, J. J. Hu, J. Shen, H. El-Nezami and D. Yang, *J. Am. Chem. Soc.* 2014, **136**, 11728.

9. W. Zhou, S. Dong, Y. Lin, C. Lu, *Chem. Commun.* 2017, **53**, 2122.

10. H. Zhang, J. Liu, Y. Q. Sun, Y. Huo, Y. Li, W. Liu, X. Wu, N. Zhu, Y. Shi and W. Guo, *Chem. Commun.* 2015, **51**, 2721.

NaNO<sub>2</sub> (200 μM): 4 μL of 50 mM NaNO<sub>2</sub> in DI-H<sub>2</sub>O was added to a solution of 992 μL HEPES buffer and then 4 μL of 5 mM PNCL in DMSO was added to the mixture.

Na<sub>2</sub>SO<sub>4</sub> (200 μM): 4 μL of 50 mM Na<sub>2</sub>SO<sub>4</sub> in DI-H<sub>2</sub>O was added to a solution of 992 μL HEPES buffer and then 4 μL of 5 mM PNCL in DMSO was added to the mixture.

Na<sub>2</sub>S (200 μM): 4 μL of 50 mM Na<sub>2</sub>S in DI-H<sub>2</sub>O was added to a solution of 992 μL HEPES buffer and then 4 μL of 5 mM PNCL in DMSO was added to the mixture.

H<sub>2</sub>O<sub>2</sub> (200 μM): 4 μL of 50 mM H<sub>2</sub>O<sub>2</sub> in DI-H<sub>2</sub>O was added to a solution of 992 μL HEPES buffer and then 4 μL of 5 mM PNCL in DMSO was added to the mixture.

NO<sup>•</sup> (200 μM): DEA NONOate was used to generate NO. It was stored at -20 °C and dissolved in 0.01 M NaOH solution immediately prior to use. The concentration of this alkaline stock solution of DEA NONOate was measured by UV/Vis using  $\epsilon = 6500 \text{ M}^{-1} \text{ cm}^{-1}$  at 250 nm. 6.36 μL of 31.45 mM DEA NONOate in 0.01 M NaOH solution was added to a 994 μL solution of 20 μM PNCL in HEPES buffer.

HNO (200 μM): Angeli's salt (Na<sub>2</sub>N<sub>2</sub>O<sub>3</sub>) was used to generate HNO. The stock solution was made by dissolving Angeli's salt in 0.01 M NaOH solution immediately prior to use. The concentration of this alkaline stock solution of Angeli's salt was measured by UV/Vis is using  $\epsilon = 6100 \text{ M}^{-1} \text{ cm}^{-1}$  at 237 nm. 6.33 μL of 31.55 mM stock solution of H<sub>2</sub>O<sub>2</sub> in DI-water was added to a 994 μL solution of 20 μM PNCL in HEPES buffer.

O<sub>2</sub><sup>-</sup> (200 μM): 1 mg KO<sub>2</sub> (final concentration 200 μM) was added to a 70 mL solution of 20 μM PNCL in HEPES buffer.

OH<sup>•</sup> (200 μM): 1 mg Fe(ClO<sub>4</sub>)<sub>2</sub> (final concentration 200 μM) was added to a 30 mL solution of 20 μM PNCL and H<sub>2</sub>O<sub>2</sub> (final concentration 200 μM) in HEPES buffer.

OCl<sup>-</sup> (200 μM): 4 μL of 50 mM NaOCl in DI-H<sub>2</sub>O was added to a solution of 992 μL HEPES and 4 μL of 5 mM PNCL in DMSO was added into this mixture.

<sup>1</sup>O<sub>2</sub>: 4 μL of 5 mM PNCL in DMSO, 8 μL of 25 mM Rose bengal in DI-H<sub>2</sub>O were added to a solution of 988 μL HEPES and illuminated with 500 nm wavelength for 10 min before time scanning. Longer illumination times of 30 minutes also showed no response.

Blank: 3.1 μL of a 0.20 M NaOH in DI-H<sub>2</sub>O was added to a solution of 993 μL HEPES and 4 μL of 5 mM PNCL in DMSO was added into this mixture.

OH<sup>•</sup> interference: 4 μL of 50 mM FeCl<sub>2</sub> and 4 μL of 50 mM H<sub>2</sub>O<sub>2</sub> were added to a solution of 984 μL HEPES buffer containing 20 μM PNCL. 4 μL of 50 mM ONOO<sup>-</sup> was then added to that solution, and the mixture was shaken gently before testing.



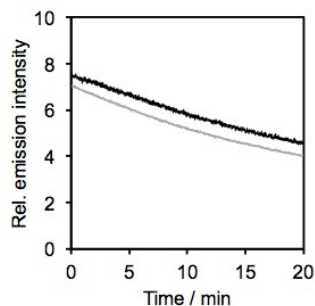

**Figure S4.** Chemiluminescence response of 20  $\mu\text{M}$  PNCL and 200  $\mu\text{M}$   $\text{ONOO}^-$  in the (grey trace) presence of  $\text{OH}^\bullet$  and (black trace) absence of  $\text{OH}^\bullet$ . Luminescence responses were collected using the time scan module by setting the emission wavelength to 525 nm.

## 7. Synthesis of XF1

**3 - Oxo - 3H - spiro [isobenzofuran - 1, 9' - xanthene]- 3', 6' - diyl bis (2 - (diphenylphosphanyl)benzoate) (XF1).** 2-(diphenylphosphino) benzoic acid (336.9 mg, 1.1 mmol, 2.2 equiv) and HBTU (417.2 mg, 1.1 mmol, 2.2 equiv) were dissolved in 5 mL of DMF. DIPEA (0.52 mL, 3.0 mmol, 6.0 equiv) was added and the reaction was stirred for five minutes. Fluorescein (166.2 mg, 0.5 mmol, 1.0 equiv) was added and the reaction was stirred for 24 h. The reaction mixture was concentrated and purified by silica gel column chromatography (1:1 Hexanes/EtOAc) to yield **XF1** (78.4 mg, 17% yield) as a white solid.  $^1\text{H}$  NMR (500 MHz,  $\text{CDCl}_3$ )  $\delta$  8.25–8.23 (m, 2H), 8.01 (d, 1H,  $J = 7.5$  Hz), 7.66 (td, 1H,  $J = 7.5$ ,  $J = 1.2$  Hz), 7.61 (td, 1H,  $J = 7.5$ ,  $J = 1.2$  Hz), 7.49–7.45 (m, 4H), 7.35–7.25 (m, 20H), 7.12 (d, 1H,  $J = 7.4$  Hz), 7.01–6.98 (m, 2H), 6.90 (d, 2H,  $J = 2.3$  Hz), 6.74 (d, 2H,  $J = 8.6$  Hz), 6.63 (dd, 2H,  $J = 8.6$  Hz, 2.3 Hz);  $^{13}\text{C}$  NMR (125 MHz,  $\text{CDCl}_3$ )  $\delta$  169.53, 164.86, 153.29, 151.93, 151.48, 137.53, 137.45, 135.35, 134.56, 134.20, 134.04, 133.08, 132.93, 132.86, 131.92, 131.52, 130.06, 129.28, 128.97, 128.89, 128.74, 128.68, 128.45, 126.07, 125.23, 124.24, 117.85, 116.43, 110.59, 81.85; HRMS calcd for  $\text{C}_{58}\text{H}_{38}\text{O}_7\text{P}_2$   $[\text{M}+\text{Na}]^+$  931.1985, found 931.1990.

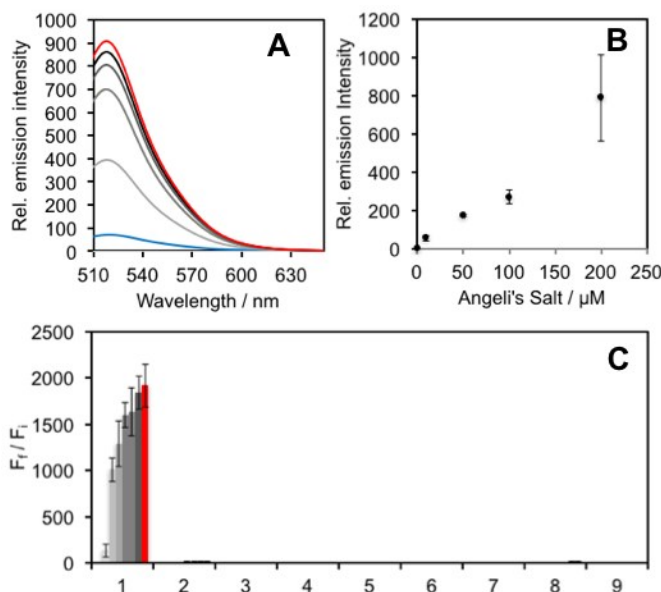

**Figure S5.** (A) Fluorescence emission of 10 μM **XF1** and 200 μM Angeli's salt after reacting for 1, 5, 10, 15, 20, 25, and 30 min in 20 mM HEPES (pH 7.42). (B) Peak emission intensity of 10 μM **XF1** and 0, 50, 100, and 200 μM Angeli's salt after reacting for 30 min in 20 mM HEPES (pH 7.4). (C) Selectivity of **XF1** versus other reactive sulfur, oxygen, and nitrogen species. Legend: 1. Angeli's salt, 2. Na<sub>2</sub>S, 3. ONOO<sup>-</sup>, 4. ClO<sup>-</sup>, 5. H<sub>2</sub>O<sub>2</sub>, 6. GSH (5 mM), 7. GSNO, 8. DEA NONOate, 9. <sup>t</sup>BuOOH.

## 8. XF1 response and selectivity tests

**Response.** Wavelength scan of fluorescent emission of 10 μM **XF1** at 488 nm before and after adding 200 μM Angeli's salt were acquired in 20 mM HEPES buffer (pH 7.4). 996 μL HEPES was added to an Eppendorf tube, then 2 μL of 5 mM **XF1**, and 2.3 μL of 86 mM Angeli's salt were added. The mixtures were vortexed for 5 seconds. The reaction was monitored every 5 minutes for 30 minutes.

**Selectivity.** Selectivity for **XF1** was performed by treating it with various reactive species (5 mM glutathione and 200 μM for other species) by monitoring fluorescent change every 5 minutes for 30 minutes with excitation wavelength at 488 nm. Stock solution was prepared as 5 mM in DMSO and the selectivity reactions were performed in 20 mM HEPES (pH 7.4).

## 9. Inhibition experiments with HCO<sub>3</sub><sup>-</sup> and TEMPOL

Different volumes of 100 mM HCO<sub>3</sub><sup>-</sup> in DI-H<sub>2</sub>O (0 μL, 2 μL, 5 μL, 10 μL and 50 μL) were added to the 20 mM HEPES buffer in the presence of 10 μL of 5 mM isatin (50 μM final concentration) in DMSO, followed by adding 5.29 μL of 37.9 mM ONOO<sup>-</sup> (200 μM final concentration). The cuvette was shaken gently to assure mixing. Then, fluorescence spectra of the anthranilic acid product were acquired 1 min after addition with excitation wavelength at 320 nm.

Different volumes of 100 mM TEMPOL in DI-H<sub>2</sub>O (0 μL, 2 μL, 5 μL, 10 μL and 50 μL) were added to the 20 mM HEPES buffer in the presence of 10 μL of 5 mM isatin in DMSO (50 μM final

concentration), followed by adding 5.29  $\mu\text{L}$  of 37.9 mM  $\text{ONOO}^-$  (200  $\mu\text{M}$  final concentration). The cuvette was shaken gently to assure mixing. Then, fluorescence spectra of the anthranilic acid product were acquired 1 min after addition of  $\text{ONOO}^-$  with excitation wavelength at 320 nm.

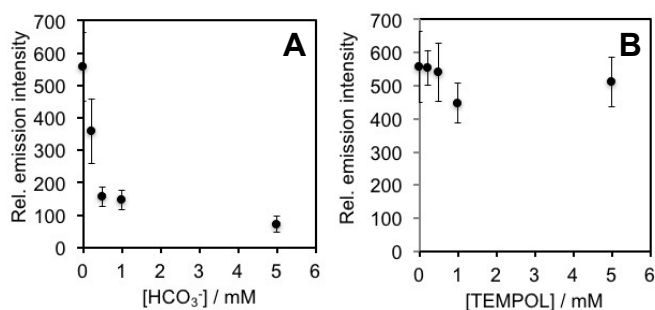

**Figure S6.** Inhibitor experiments with isatin. (A) Fluorescence emission intensity at 400 nm of 50  $\mu\text{M}$  isatin, 200  $\mu\text{M}$   $\text{ONOO}^-$ , and 0–5 mM  $\text{NaHCO}_3$ . (B) Fluorescence emission intensity at 400 nm of 50  $\mu\text{M}$  isatin, 200  $\mu\text{M}$   $\text{ONOO}^-$ , and 0–5 mM TEMPOL. All experiments were performed in 20 mM HEPES (pH 7.4), containing 1% DMSO with  $\lambda_{\text{ex}} = 320$  nm.

## 10. Inhibition experiments with $\text{HCO}_3^-$ and glutathione

### Inhibition of response by glutathione

Different volumes of 50 mM glutathione in  $\text{DI-H}_2\text{O}$  (0  $\mu\text{L}$ , 1  $\mu\text{L}$ , 2  $\mu\text{L}$ , 4  $\mu\text{L}$  and 20  $\mu\text{L}$ ) were added to the 20 mM HEPES buffer in the presence of 4  $\mu\text{L}$  of 5 mM PNCL in DMSO (20  $\mu\text{M}$  final concentration), followed by adding 5.2  $\mu\text{L}$  of 38.4 mM  $\text{ONOO}^-$  (200  $\mu\text{M}$  final concentration). The cuvette was shaken gently to assure mixing. Then time scans were acquired using the time scan module with emission wavelength at 525 nm.

Different volumes of 50 mM glutathione in  $\text{DI-H}_2\text{O}$  (0  $\mu\text{L}$ , 1  $\mu\text{L}$ , 2  $\mu\text{L}$ , 4  $\mu\text{L}$  and 20  $\mu\text{L}$ ) were added to the 20 mM HEPES buffer in the presence of 4  $\mu\text{L}$  of 5 mM PNCL in DMSO (20  $\mu\text{M}$  final concentration), followed by adding 1.2  $\mu\text{L}$  of 172.7 mM Angeli's salt (200  $\mu\text{M}$  final concentration). The cuvette was shaken gently to assure mixing. Then time scans were acquired using the time scan module with emission wavelength at 525 nm.

### Inhibition of response by $\text{HCO}_3^-$

Different volumes of 50 mM  $\text{NaHCO}_3$  in  $\text{DI-H}_2\text{O}$  (0  $\mu\text{L}$ , 1  $\mu\text{L}$ , 2  $\mu\text{L}$ , 4  $\mu\text{L}$  and 20  $\mu\text{L}$ ) were added to the 20 mM HEPES buffer in the presence of 2  $\mu\text{L}$  of 5 mM PNCL in DMSO (20  $\mu\text{M}$  final concentration), followed by adding 5.2  $\mu\text{L}$  of 38.4 mM  $\text{ONOO}^-$  (200  $\mu\text{M}$  final concentration). The cuvette was shaken gently to assure mixing. Then time scans were acquired using the time scan module with emission wavelength at 525 nm.

Different volumes of 50 mM  $\text{NaHCO}_3$  in  $\text{DI-H}_2\text{O}$  (0  $\mu\text{L}$ , 20  $\mu\text{L}$ , 40  $\mu\text{L}$ , 60  $\mu\text{L}$ , 80  $\mu\text{L}$  and 100  $\mu\text{L}$ ) were added to the 20 mM HEPES buffer in the presence of 4  $\mu\text{L}$  of 5 mM PNCL in DMSO (20  $\mu\text{M}$  final concentration), followed by adding 1.1  $\mu\text{L}$  of 177.4 mM Angeli's salt (200  $\mu\text{M}$  final concentration). The cuvette was shaken gently to assure mixing. Then time scans were acquired using the time scan module with emission wavelength at 525 nm.

### Inhibition experiments for XF1

Different volumes of 50 mM glutathione in DI-H<sub>2</sub>O (0  $\mu$ L, 1  $\mu$ L, 2  $\mu$ L, 4  $\mu$ L and 20  $\mu$ L) were added to the 20 mM HEPES buffer in the presence of 2  $\mu$ L of 5 mM **XF1** (10  $\mu$ M final concentration) in DMSO, followed by adding 1.2  $\mu$ L of 172.7 mM Angeli's salt. The cuvette was shaken gently to assure mixing. **Then** time scans were acquired using the time scan module with emission wavelength at 525 nm.

Different volumes of 50 mM NaHCO<sub>3</sub> in DI-H<sub>2</sub>O (0  $\mu$ L, 20  $\mu$ L, 40  $\mu$ L, 60  $\mu$ L, 80  $\mu$ L and 100  $\mu$ L) were added to the 20 mM HEPES buffer in the presence of 2  $\mu$ L of 5 mM **XF1** in DMSO (10  $\mu$ M final concentration), followed by adding 1.1  $\mu$ L of 177.4 mM Angeli's salt (200  $\mu$ M final concentration). The cuvette was shaken gently to assure mixing. **Then** time scans were acquired using the time scan module with emission wavelength at 525 nm.

## 11. Cell culture

Macrophages (RAW 264.7) were purchased from ATCC and cultured in high glucose Dulbecco's Modified Eagle Media (DMEM) supplemented with 10% Fetal Bovine Serum (FBS) and 1% antibiotics (penicillin/streptomycin, 100 U/mL). Cells were maintained in a humidified incubator at 37 °C with 5% CO<sub>2</sub>. 12 hours before the **experiment**, **cells** were passed and plated on multi-well plates by adding 1000K–1500K of macrophages per well, filling each well with 1 mL of media.

Cells were maintained in a humidified incubator at 37 °C with 5% CO<sub>2</sub>. Two days before the **experiment**, **cells** were passed and plated on Costar® 12-well plates by adding 150K–200K of A549 **cells** per well, filling each well up to 1 mL of media.

Chemiluminescent responses and MTT absorption were measured using a Cytation 5 BioTek plate reader (Winooski, VT). Fluorescent imaging was conducted using an EVOS-fl fluorescent microscope (Advanced Microscopy Group) equipped with a GFP filter cube.

## 12. MTT assay

3-(4,5-Dimethylthiazol-2-yl)-2,5-diphenyltetrazolium bromide (MTT) assay: RAW 264.7 macrophage **cells** (10<sup>6</sup> **cell**/mL) were seeded in a 96-well plate to a total volume of 100  $\mu$ L/well. The plate was maintained at 37 °C with 5% CO<sub>2</sub> for 12 h. Cells were **then** incubated for 24 h after adding different concentrations of **PNCL**, 0, 0.1, 1, 10, 100 and 1000  $\mu$ M respectively. 10  $\mu$ L of the MTT reagent (Cayman Chemical, Ann Arbor, MI) was **then** added to each well, and mixed gently. After 4 h incubation, 100  $\mu$ L of crystal dissolving solution was added to each well to dissolve the formazan crystals. Absorbance was measured at 570 nm in a Cytation 5 BioTek plate reader.<sup>11</sup>

---

11. W. Huber and J. C. Koella, *Acta Trop.* **1993**, *55*, 257–261.

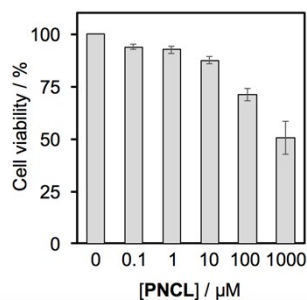

**Figure S7.** MTT assay of RAW264.7 macrophage cells in the presence of different concentrations of PNCL. Error bars are  $\pm$ S.D. (n = 3).

### 13. Cellular internalization of PNCL.

RAW264.7 macrophage cells ( $10^6$  cell/mL) were seeded in a 12-well plate to a total volume of 1 mL/well. Plate was maintained at 37 °C with 5% CO<sub>2</sub> for 12 h. Prior to imaging, the medium was removed and cells were washed with 2 x 1 mL PBS, and each well was filled with 992  $\mu\text{L}$  of PBS. Then, 8  $\mu\text{L}$  of 5 mM PNCL in DMSO (40  $\mu\text{M}$  final concentration) or 8  $\mu\text{L}$  DMSO was added. The plate was imaged on an EVOS-fl fluorescent microscope using a GFP filter set after 10 min incubation.

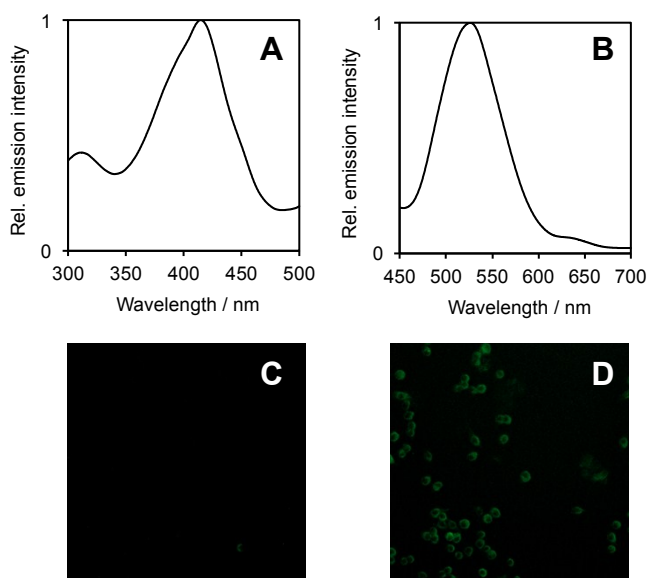

**Figure S8.** Cellular internalization of PNCL. Normalized fluorescence (A) excitation and (B) emission spectrum of PNCL in 20 mM HEPES (pH 7.4). Confocal fluorescence images of living RAW 264.7 cells in (C) the absence of PNCL or (D) presence of 40  $\mu\text{M}$  PNCL.

### 14. Detection of SIN-1 generated ONOO<sup>-</sup> in living cells

#### Detection of SIN-1 generated ONOO<sup>-</sup> in macrophages

RAW 264.7 macrophage cells ( $10^6$  cell/mL) were seeded in a 12-well plate to a total volume of 1 mL/well. Prior to imaging, the medium was removed and cells were washed with 1 x 1 mL PBS.

Each well was filled with 996  $\mu\text{L}$  of FluoroBrite DMEM Media. Then, 4  $\mu\text{L}$  of 5 mM PNCL in DMSO (20  $\mu\text{M}$  final concentration) was added to each well, and incubated for 30 min. After incubation, the media was removed and cells were washed with 2 x 1 mL PBS. Different amount of PBS media was added into each well to make the final volume equal to 1 mL. Different volumes of 50 mM SIN-1 in DMSO (0  $\mu\text{L}$ , 8  $\mu\text{L}$ , 16  $\mu\text{L}$ , 20  $\mu\text{L}$ , and 40  $\mu\text{L}$ ) were added into each well. Then luminescence response was measure by the Cytation 5 BioTek plate reader by using the luminescence detection method, endpoint read type, and setting gain to 135 and temperature to 37  $^{\circ}\text{C}$ .

#### Detection of SIN-1 generated ONOO<sup>-</sup> in A549 cells

Human lung adenocarcinoma epithelial cell (A549) were plated in a 12-well plate to a total volume of 1 mL/well. The media was removed upon 90–95% confluence. Each well was washed with 1 x 1 mL PBS, and each well was filled with 996  $\mu\text{L}$  of FluoroBrite DMEM Media. Then, 4  $\mu\text{L}$  of 5 mM PNCL in DMSO (20  $\mu\text{M}$  final concentration) was added to each well, and incubated for 30 min. After incubation, the media was removed and cells were washed with 2 x 1 mL PBS. Different amount of PBS media was added into each well to make the final volume equal to 1 mL. Different volumes of 50 mM SIN-1 in DMSO (0  $\mu\text{L}$ , 8  $\mu\text{L}$ , 16  $\mu\text{L}$ , 20  $\mu\text{L}$ , and 40  $\mu\text{L}$ ) were added into each well. Then luminescence response was measure by the plate reader.

Scavenger experiment in macrophages. Macrophages were washed with 1 x 1 mL PBS, and each well was filled with 996  $\mu\text{L}$  of FluoroBrite DMEM Media. Then, 4  $\mu\text{L}$  of 5 mM PNCL in DMSO (20  $\mu\text{M}$  final concentration) was added to each well, and incubated for 30. The media was removed after incubation and cells were washed with 2 x 1 mL PBS. Different amount of PBS media was added into each well to make the final volume equal to 1 mL. 40  $\mu\text{L}$  of 50 mM SIN-1 in DMSO, 1.4  $\mu\text{L}$  or 2.8  $\mu\text{L}$  of 2 mg/ mL Mn(III)TMPyP were added.

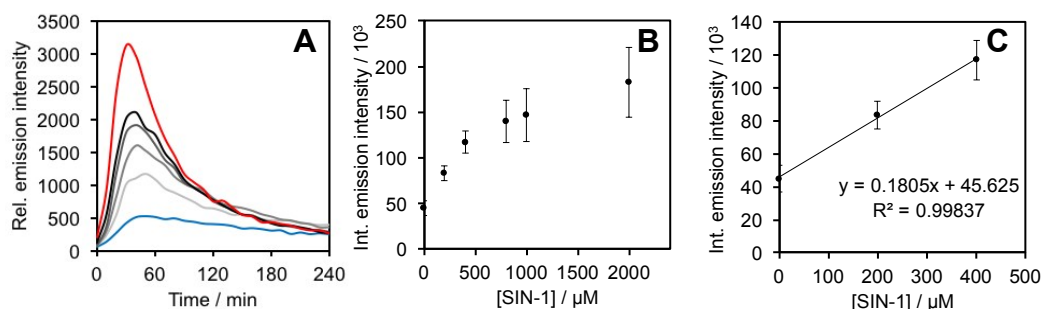

**Figure S9.** ONOO<sup>-</sup> detection in A549 cells. (A) Time scans and (B) integrated intensity of chemiluminescence emission of A549 cells incubated with 20  $\mu\text{M}$  PNCL for 30 minutes, washed and then treated with 0 (blue trace), 200  $\mu\text{M}$ , 400  $\mu\text{M}$ , 800  $\mu\text{M}$ , 1 mM, and 2 mM (red trace) SIN-1. (C) The linear region of the response curve shown in (B).

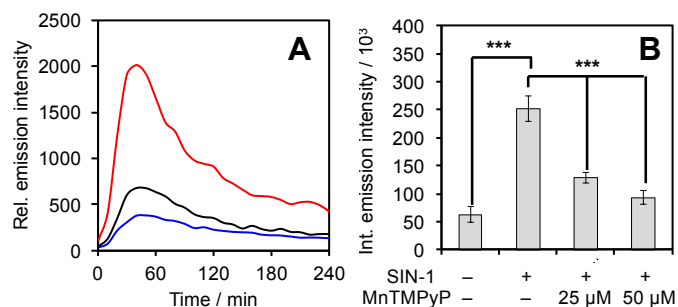

**Figure S10.** Inhibition of signal from SIN-1 by ONOO<sup>-</sup> scavenger MnTMPyP. (A) Time scans of RAW 264.7 macrophages incubated with 20 μM PNCL for 30 minutes, washed, and then incubated with (blue trace) vehicle control, (red trace) 2 mM SIN-1, or (black trace) 2 mM SIN-1 and 50 μM Mn(III)TMPyP. (B) Integrated intensity of chemiluminescence emission of RAW 264.7 macrophages incubated with 20 μM PNCL for 30 minutes, washed, and then incubated with vehicle control, 2 mM SIN-1, 2 mM SIN-1 and 25 μM MnTMPyP, or 2 mM SIN-1 and 50 μM MnTMPyP. Error bars are S.D. from n = 3 wells. Statistical significance was assessed using a two-tailed student's t-test. \*\*\* p < 0.001.

**15. Application of PNCL for detecting endogenous ONOO<sup>-</sup>.** 0.1 mg/mL LPS was prepared in DI-H<sub>2</sub>O, and 2 mg/mL Mn(III)TMPyP solution was made in 20 mM PBS buffer (pH = 7.42) on the same day of the test. Prior to imaging, media was removed from macrophages and macrophages were washed with 1 x 1 mL PBS, and each well was filled with FluoroBrite DMEM Media. 10 μL of LPS (1000 ng/mL final concentration) were added to experimental wells, and the control was performed by treating with vehicle. After 16 h incubation, 4 μL of 5 mM PNCL (20 μM final concentration) was added to each well, and incubated for another 30 min. After incubation, the media was removed and cells were washed with 2 x 1 mL PBS, and vehicle or 25 μM Mn(III)TMPyP was added to the appropriate wells. Then the luminescence response was measured every 10 minutes over 4 hours.

**16. iNOS inhibition of the production of ONOO<sup>-</sup> in macrophages.** 0.1 mg/mL LPS and 10 mg/mL 1400W (Cayman Chemical, Ann Arbor, MI) were prepared in DI-H<sub>2</sub>O on the same day of the test. Prior to imaging, media was removed from macrophages and cells were washed with 1 x 1 mL PBS, and each well was filled with FluoroBrite DMEM Media. 10 μL of LPS (1000 ng/mL final concentration) and 5 μL of 1400W (200 μM final concentration) were added to the appropriate wells. The control was performed by treating with vehicle. After 16 h incubation, 4 μL of 5 mM PNCL (20 μM final concentration) was added to each well, and incubated for another 30 min. The media was removed and cells were washed with 2 x 1 mL PBS. 5 μL of 1400W were added for the inhibition tests. Then the luminescence response was measured every 10 minutes over 4 hours.

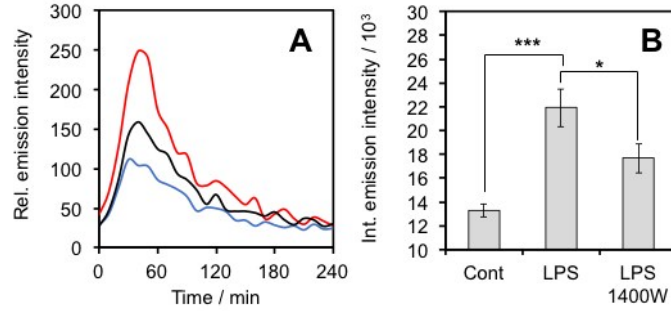

**Figure S11.** Inhibition of iNOS mediated ONOO<sup>-</sup> production. (A) Time scans of RAW 264.7 macrophages incubated with (blue trace) vehicle control, (red trace) 1000 ng/mL LPS, or (black trace) 1000 ng/mL LPS and 200 μM 1400W for 16 hours, then incubated with 20 μM PNCL and vehicle control or 1400W for 30 minutes, washed and measured. (B) Integrated intensity of chemiluminescence emission of RAW 264.7 macrophages incubated with vehicle control, 1000 ng/mL LPS, or 1000 ng/mL LPS and 200 μM 1400W for 16 hours, then incubated with 20 μM PNCL and vehicle control or 1400W for 30 minutes, washed and measured. Error bars are S.D. from n = 3 wells. Statistical significance was assessed using a two-tailed student's t-test. \*\*\* p < 0.001, \* p < 0.05.



# 17. Scanned <sup>1</sup>H and <sup>13</sup>C NMR spectra

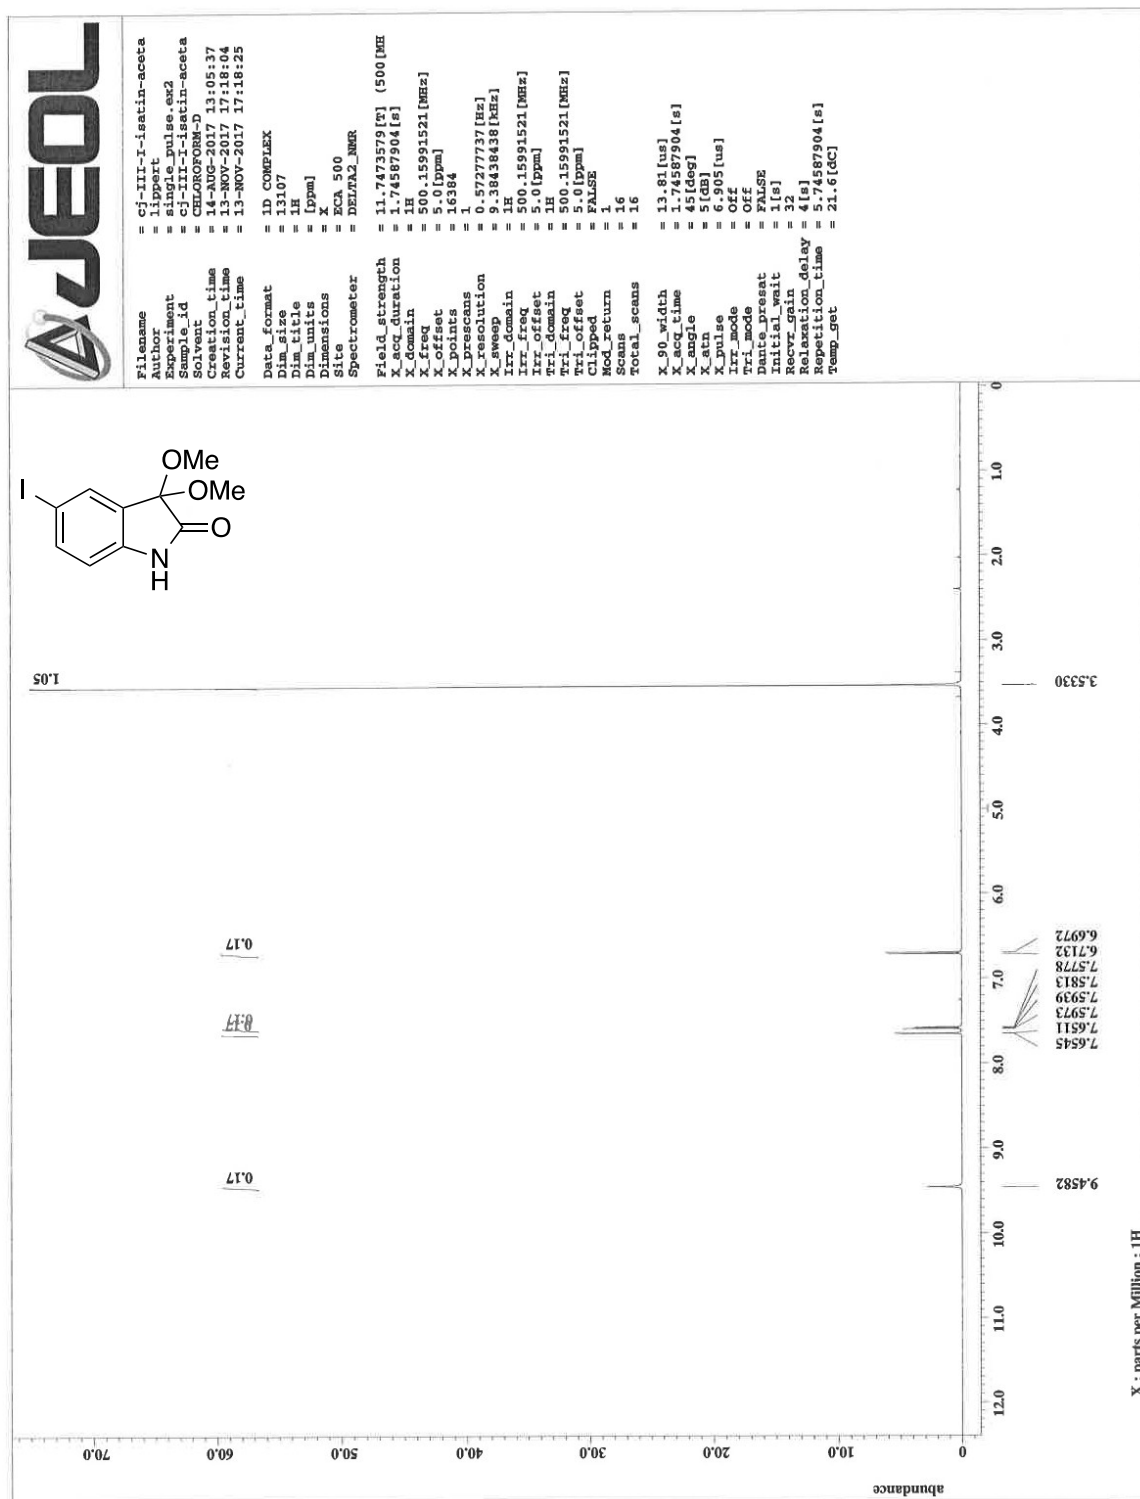

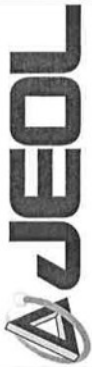

Filename = cj-111-i-isatin-aceta  
Author = lipbert  
Experiment = single\_pulse\_dec  
Sample\_Id = CJ-111-i-isatin-aceta  
Date\_Exp = 14-AUG-2017 13:08:26  
Creation\_time = 14-AUG-2017 13:08:26  
Revision\_time = 14-AUG-2017 14:22:11  
Current\_time = 14-AUG-2017 14:22:25  
Data\_format = 1D\_COMPLEX  
Dir\_size = 26214  
Dir\_title = 13C  
Dimensions = 1  
Site = ECA 500  
Spectrometer = DELTA2\_NMR  
Field\_strength = 11.7473579 [T] (500 [MH  
X\_acq\_duration = 0.83361792 [s]  
X\_domain = 13C  
X\_freq = 125.76529768 [MHz]  
X\_points = 32768  
X\_prescans = 4  
X\_resolution = 1.15959034 [Hz]  
X\_sweep = 39.3081761 [kHz]  
Irr\_domain = 1H  
Irr\_freq = 500.15991521 [MHz]  
C1r\_offset = 5.0 [ppm]  
Mod\_return = 1  
Scans = 8  
Total\_scans = 8  
X\_90\_width = 14.5 [us]  
X\_acq\_time = 0.83361792 [s]  
X\_angle = 30 [deg]  
X\_atn\_dec = 21 [dB]  
X\_pulse = 4.96666667 [us]  
Irr\_atn\_dec = 21 [dB]  
Irr\_atn\_noe = 21 [dB]  
Decoupling = WALTZ  
Initial\_wait = TRUE  
Roe\_time = 1 [s]  
Roe\_gain = 60  
Relaxation\_delay = 2 [s]  
Repetition\_delay = 2.83361792 [s]  
Repetition\_time = 2.83361792 [s]  
Temp\_get = 21.7 [dC]

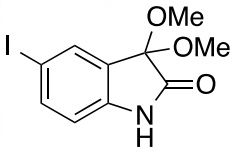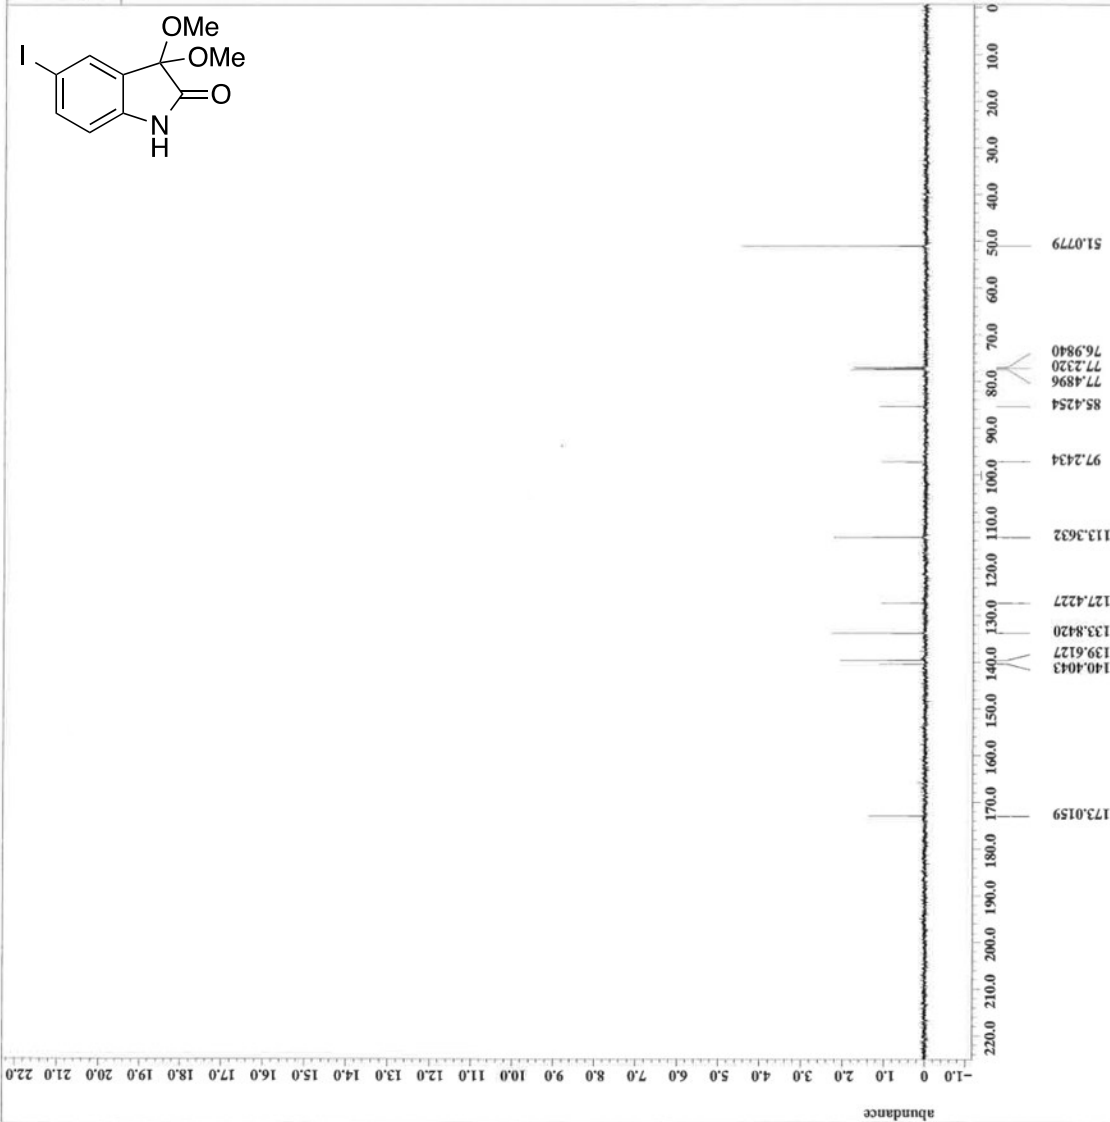

X : parts per Million : 13C

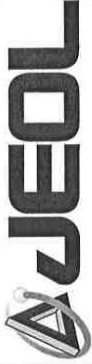

File: cj-11-468-F2\_PROTON-9  
Author: lipbert  
Experiment: single\_pulse.exc2  
Sample\_id: CJ-11-468-F2  
Date: 2017-11-13 13:02:13  
Creation\_time: 12-JUL-2017 13:02:13  
Revision\_time: 13-NOV-2017 17:22:41  
Current\_time: 13-NOV-2017 17:23:03  
Data\_format: ID COMPLEX  
Data\_size: 13107  
Dir\_title: H  
Dir\_units: [ppm]  
Dimensions: X  
Site: ECA 500  
Spectrometer: DELTA2\_NMR  
Field\_strength: 11.7473579 [T] (500 [MHZ])  
X\_acq\_duration: 1.74587904 [s]  
X\_domain: H  
X\_freq: 500.15991521 [MHZ]  
X\_offset: 16384  
X\_pins: 1  
X\_prescans: 1  
X\_resolution: 0.57277737 [Hz]  
X\_sweep: 9.38438438 [kHz]  
Irr\_domain: H  
Irr\_freq: 500.15991521 [MHZ]  
Irr\_offset: 5.0 [ppm]  
Tri\_domain: H  
Tri\_freq: 500.15991521 [MHZ]  
Tri\_offset: 5.0 [ppm]  
Clipped: FALSE  
Mod\_return: 1  
Scans: 16  
Total\_scans: 16  
X\_90\_width: 13.81 [us]  
X\_acq\_time: 1.74587904 [s]  
X\_angle: 45 [deg]  
X\_atn: 5 [dB]  
X\_pulse: 6.905 [us]  
Irr\_mode: Off  
Tri\_mode: Off  
Dante\_preset: FALSE  
Initial\_wait: 1 [s]  
Relaxation\_delay: 4 [s]  
Repetition\_delay: 4 [s]  
Repetition\_time: 5.74587904 [s]  
Temp\_get: 20.8 [C]

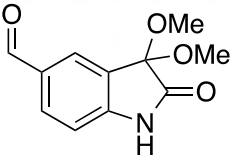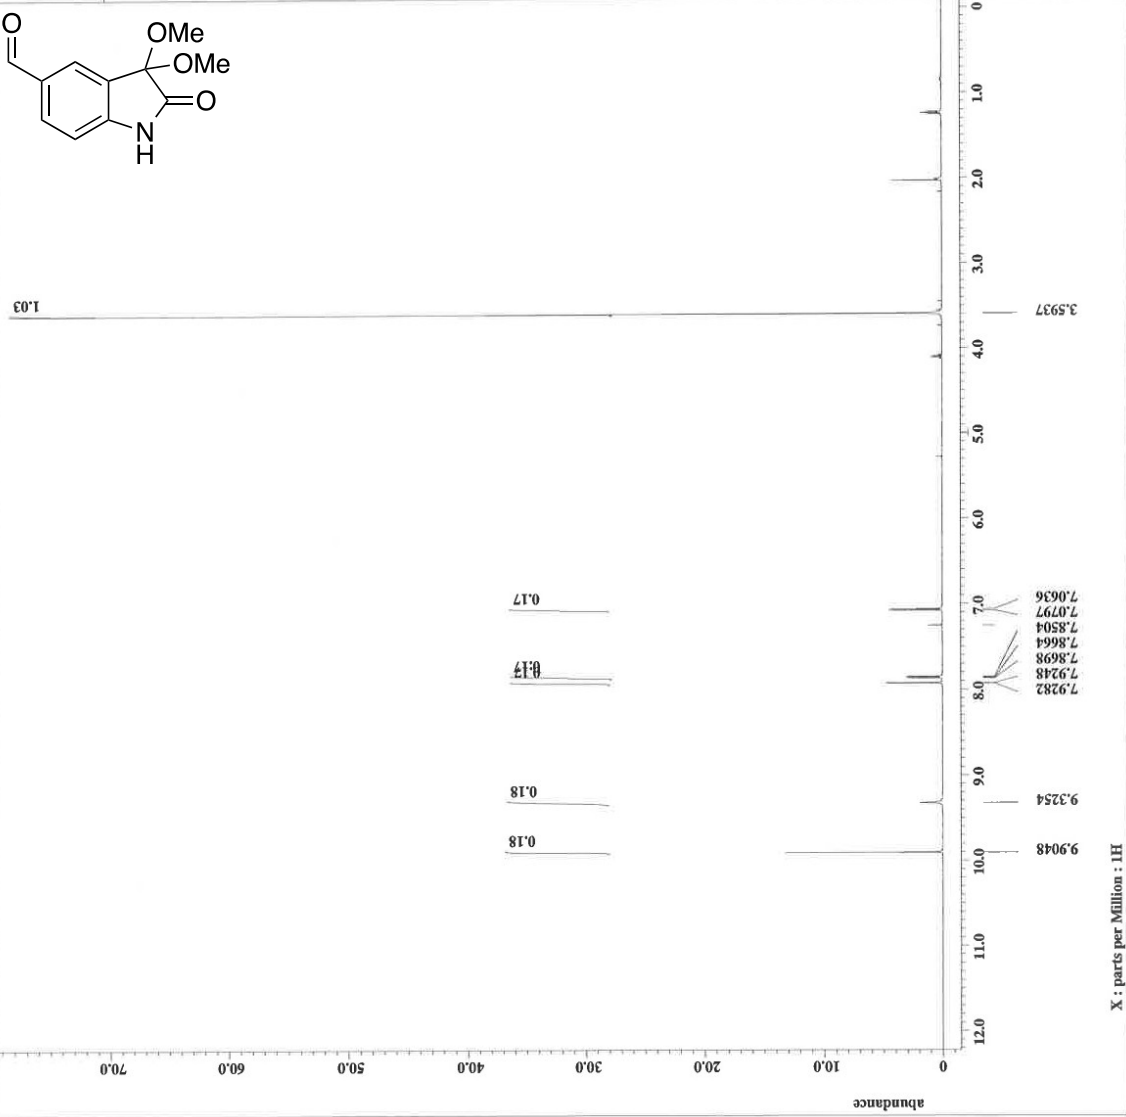

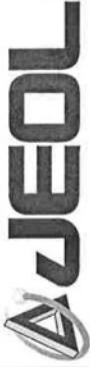

File: cj-II-468-F2\_CARBON-7  
Experiment: lippert  
Single\_pulse\_dec: single\_pulse\_dec  
Sample\_id: cj-II-068-F2  
Sample\_name: 068-F2  
Creation\_time: 12-JUL-2017 13:08:01  
Revision\_time: 12-JUL-2017 14:21:56  
Current\_time: 12-JUL-2017 14:22:20

Data\_format: 1D COMPLEX  
Dim\_size: 26214  
Dim\_title: 13C  
Dim\_units: ppm  
Dimensions: X  
Site: ECA 500  
Spectrometer: DELTA2\_NMR

Field\_strength: 11.7473579 [T] (500 [MH])  
X\_acq\_duration: 0.83361792 [s]  
X\_domain: 13C - 76529768 [MHz]  
X\_freq: 100 [ppm]  
X\_points: 32768  
X\_prescans: 4  
X\_resolution: 1.19959034 [Hz]  
X\_sweep: 39.3081761 [kHz]  
IR\_domain: 1H  
IR\_freq: 500.15991521 [MHz]  
IR\_offset: 1.0 [ppm]  
CI: PASS  
Mod\_return: 1  
Total\_scans: 110

X\_90\_width: 14.9 [us]  
X\_acq\_time: 0.83361792 [s]  
X\_angle: 30 [deg]  
X\_delay: 1.0 [s]  
X\_pulse: 4.96666667 [us]  
IR\_atn\_dec: 21 [dB]  
IR\_atn\_doe: 21 [dB]  
IR\_noise: MALTZ  
Decoupling: TRUE  
Initial\_wait: 1 [s]  
Roc\_time: TRUE  
Soc\_time: 2 [s]  
Recvr\_gain: 66  
Relaxation\_delay: 2 [s]  
Repetition\_time: 2.83361792 [s]  
Temp\_get: 21.3 [dC]

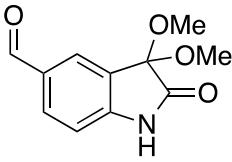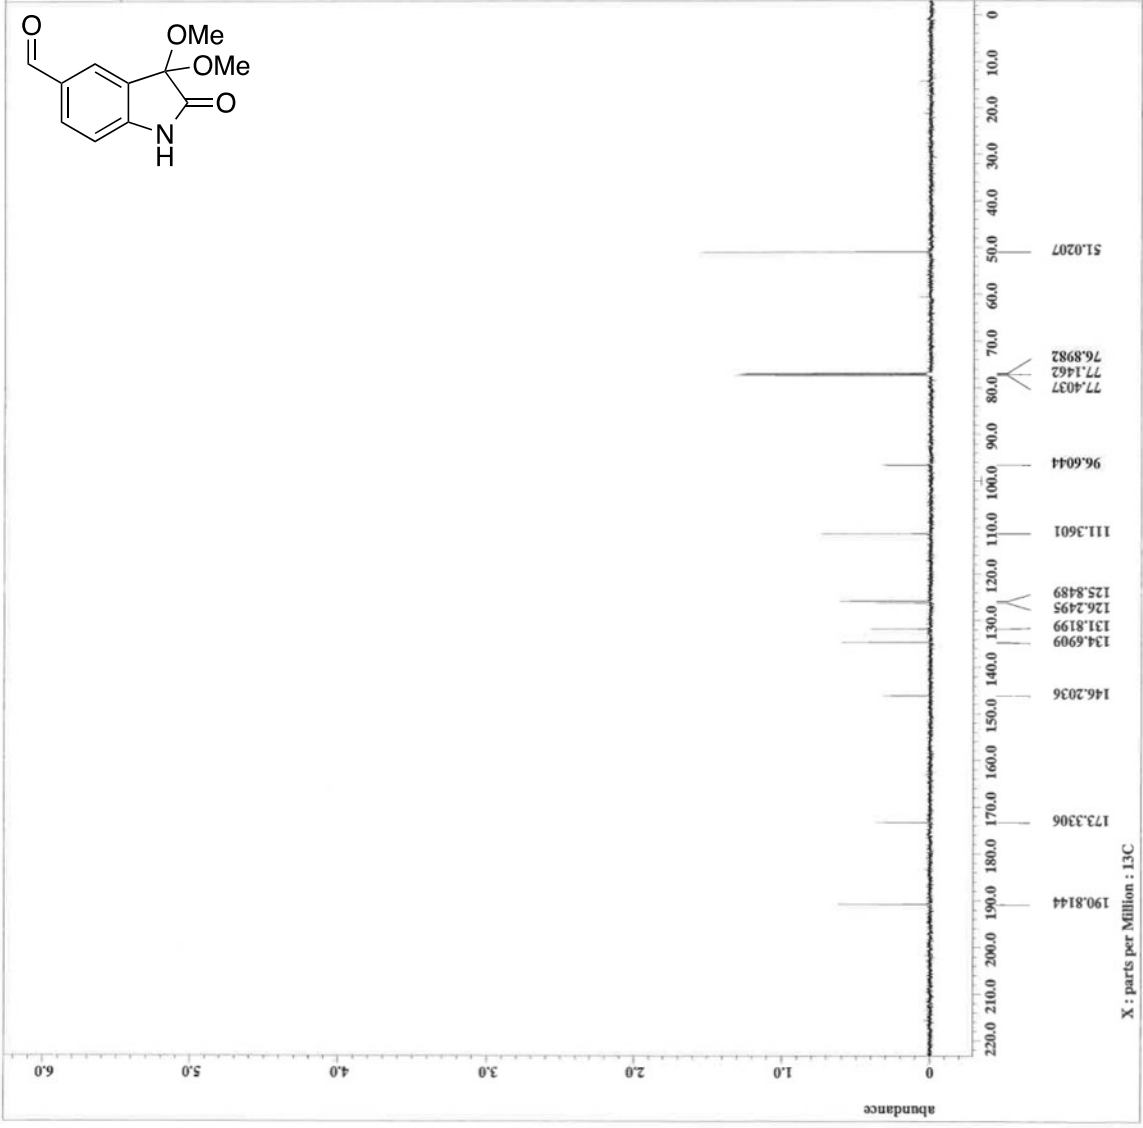

X : parts per Million : 13C

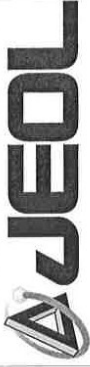

File name = cj-3-9-CRUDE\_PROTON-1  
Author = lipbert  
Experiment = single\_pulse.exe  
Sample name = CHLOROCFORM-D  
Source = CHLOROCFORM-D  
Creation time = 2-AUG-2017 14:59:09  
Revision time = 13-NOV-2017 17:26:23  
Current time = 13-NOV-2017 17:26:33  
Data format = 1D COMPLEX  
Dim\_size = 13107  
Dim\_time = 1h  
Dim\_ppm = X  
Dimensions = X  
Site = ECA 500  
Spectrometer = DELTA2\_NMR  
Field\_strength = 11.7473579 [T] (500 [MH  
X\_acq\_duration = 1.74587904 [s]  
X\_domain = 1h  
X\_freq = 500.15991521 [MHz]  
X\_offset = 5.0 [ppm]  
X\_points = 16384  
X\_prescans = 1  
X\_resolution = 0.5727737 [Hz]  
X\_sweep = 9.38438438 [MHz]  
Irr\_domain = 1h  
Irr\_freq = 500.15991521 [MHz]  
Irr\_offset = 5.0 [ppm]  
Irr\_points = 16384  
Irr\_prescans = 1  
Irr\_resolution = 0.5727737 [Hz]  
Irr\_sweep = 9.38438438 [MHz]  
Mod\_return = 1  
Scans = 16  
Total\_scans = 16  
X\_90\_width = 13.81 [us]  
X\_acq\_time = 1.74587904 [s]  
X\_angle = 45 [deg]  
X\_atn = 5 [dB]  
X\_pulse = 6.905 [us]  
Irr\_mode = Off  
Dante\_preset = FALSE  
Initial\_pulprg = 3f  
Relaxation\_delay = 4 [s]  
Repetition\_time = 5.74587904 [s]  
Temp\_set = 21.6 [dC]

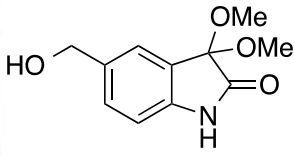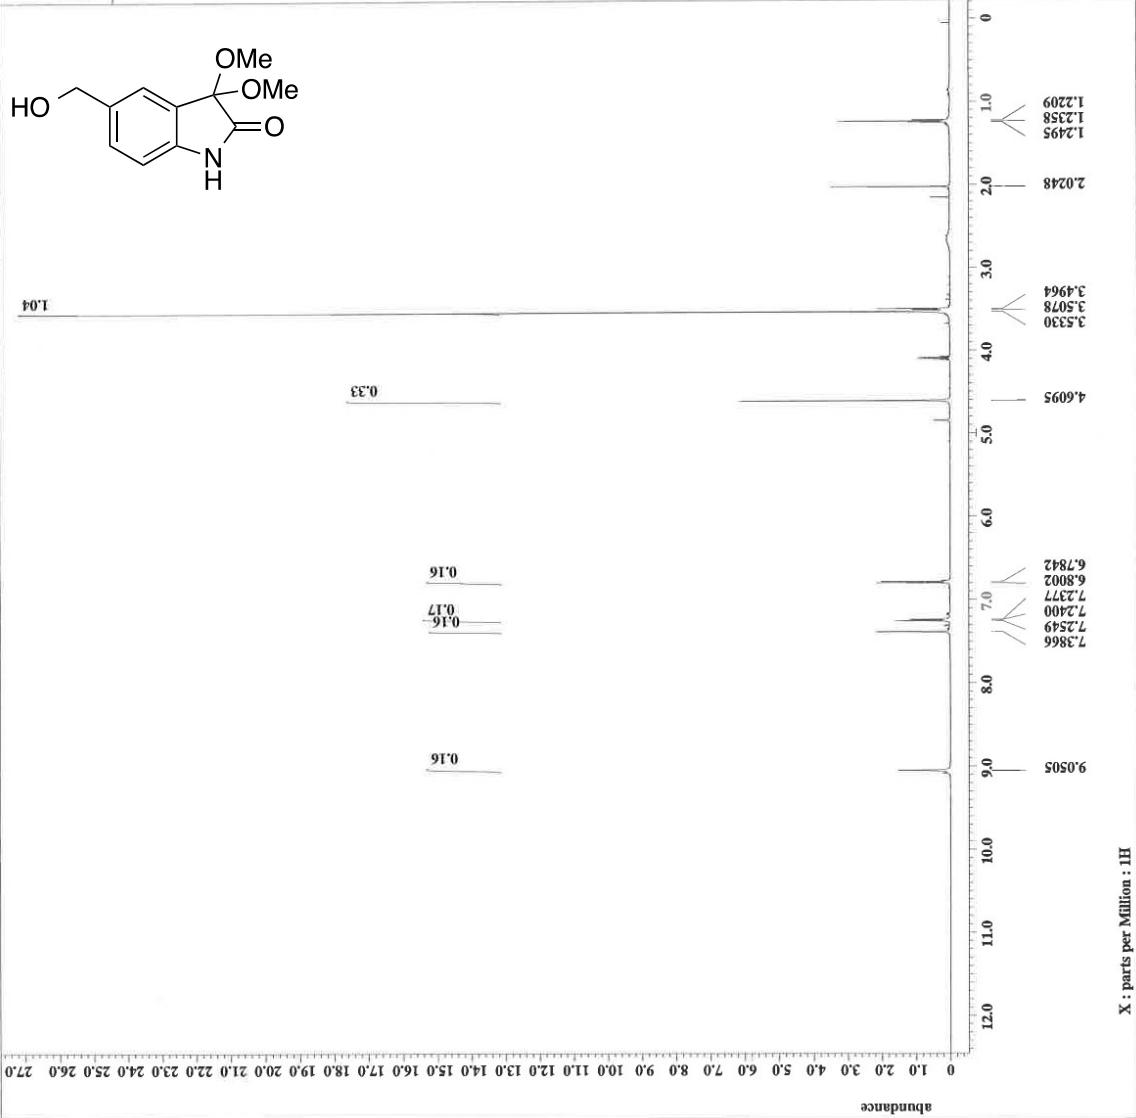

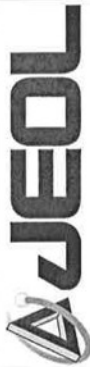

File name = c:\3-9-CRUDE\_CARBON-7  
Author = lipbert  
Experiment = 13C-9-CRUDE  
Sample id = c1-9-CRUDE  
Solvent = CHLOROFORM-D  
Creation\_time = 2-AUG-2017 15:04:36  
Revision\_time = 2-AUG-2017 16:18:35  
Current\_time = 2-AUG-2017 16:18:43  
Data format = 1D COMPLEX  
Dir\_name = 13C14  
Dir\_title = 13C  
Dim units = [ppm]  
Dimensions = X  
Site = ECA 500  
Spectrometer = DELTA2\_NMR  
Field\_strength = 11.7473579 [T] (500 [MHZ])  
X\_acq\_duration = 0.83361792 [s]  
X\_domain = 125.76529768 [MHZ]  
X\_freq = 100 [ppm]  
X\_offset = 32768  
X\_points = 4  
X\_prescans = 1.15959034 [Hz]  
X\_resolution = 39.3081761 [kHz]  
X\_sweep = 180.15991521 [MHz]  
Irr\_domain = 5.0 [ppm]  
Irr\_freq = FALSE  
Irr\_offset = 1  
Mod\_return = 47  
Total\_scans = 14.9 [us]  
X\_90\_width = 30 [deg]  
X\_acq\_time = 8.5 [dB]  
X\_attn = 4.96666667 [us]  
X\_pulse = 21 [dB]  
Irr\_atn\_dec = 21 [dB]  
Irr\_atn\_pwr = TRUE  
Irr\_noise = WALTZ  
Decoupling = WALTZ  
Initial\_wait = 21 [s]  
Noe\_time = 60  
Recovery\_gain = 21 [s]  
Relaxation\_delay = 2 [s]  
Repetition\_time = 2.83361792 [s]  
Temp\_get = 22 [degC]

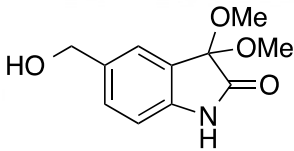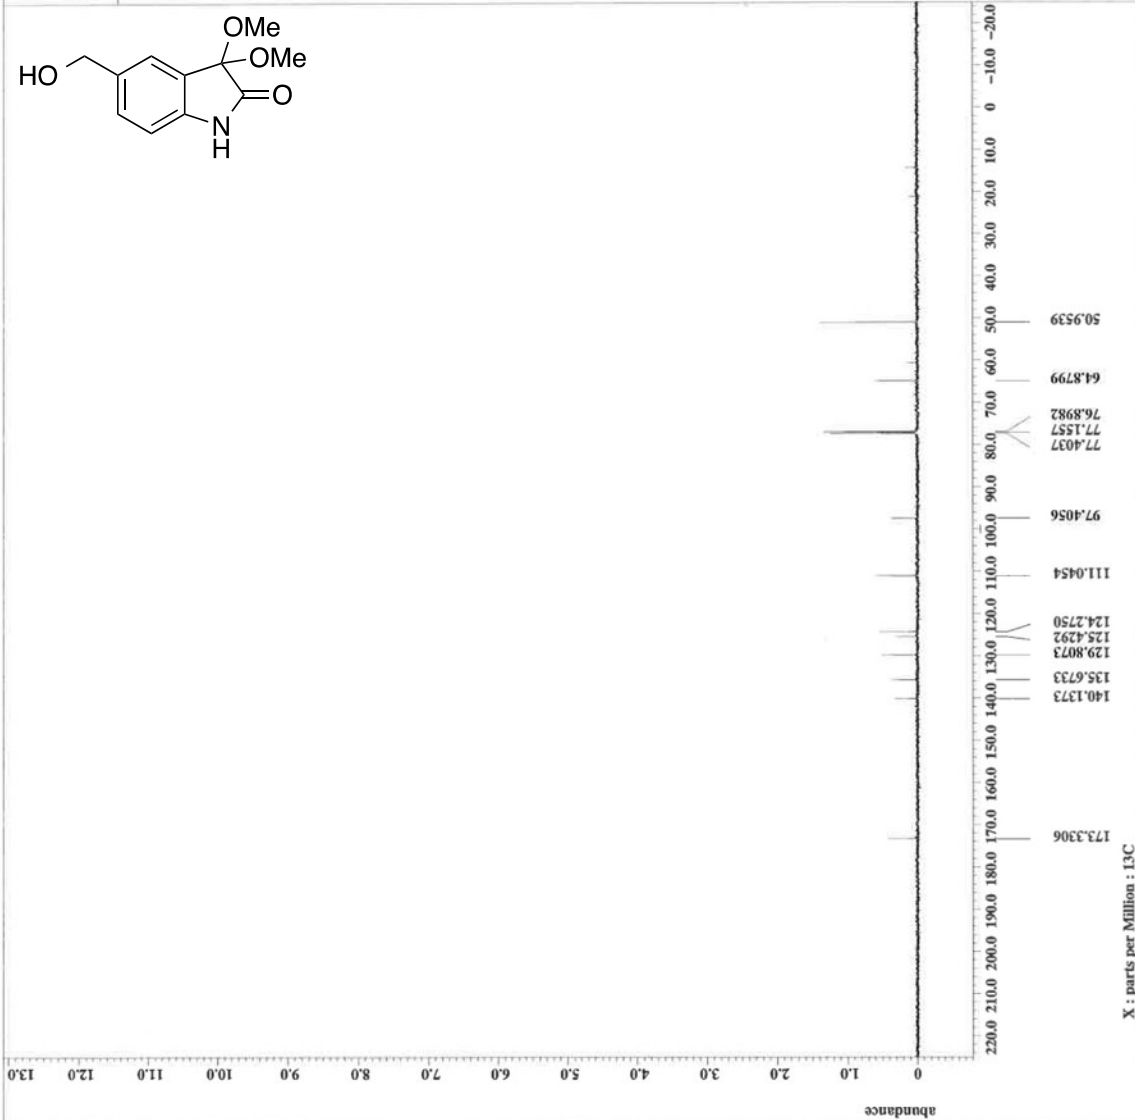

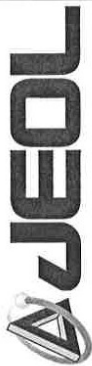

File name = cj-3-5-2ND\_PROTON-15.  
Author = rippert  
Experiment = s\_pulse.ex2  
Sample id = cj-3-5-2ND  
Solvent = ACETONE-D6  
Creation time = 31-JUL-2017 13:09:58  
Revision time = 13-NOV-2017 17:28:40  
Current time = 13-NOV-2017 17:28:42  
Data format = 1D\_COMPLEX  
Dim. 1 = 1307  
Dim. 2 = 1H  
Dim. units = [ppm]  
Dimensions = X  
Site = ECA 500  
Spectrometer = DELTA2\_NMR  
Field strength = 11.7473579 [T] (500 [MHZ])  
X\_acq\_duration = 1.74587904 [s]  
X\_domain = 500.15991521 [MHz]  
X\_freq = 500.15991521 [MHz]  
X\_offset = 5.0 [ppm]  
X\_points = 16384  
X\_prescans = 1  
X\_resolution = 0.5727737 [Hz]  
X\_sweep = 9.38438438 [MHz]  
Xr\_domain = 500.15991521 [MHz]  
Xr\_freq = 500.15991521 [MHz]  
Xr\_offset = 5.0 [ppm]  
Xr\_points = 16384  
Xr\_prescans = 1  
Xr\_resolution = 0.5727737 [Hz]  
Xr\_sweep = 9.38438438 [MHz]  
Mod\_return = 1  
Scans = 16  
Total\_scans = 16  
X\_90\_width = 13.81 [us]  
X\_acq\_time = 1.74587904 [s]  
X\_angle = 45 [deg]  
X\_atn = 5 [dB]  
X\_pulse = 6.905 [us]  
Xr\_mode = Off  
Xr\_prescans = 16  
Xr\_wait = 1 [s]  
Xr\_gain = 50  
Relaxation\_delay = 4 [s]  
Repetition\_time = 5.74587904 [s]  
Temp\_get = 21.4 [C]

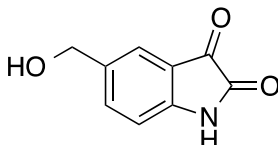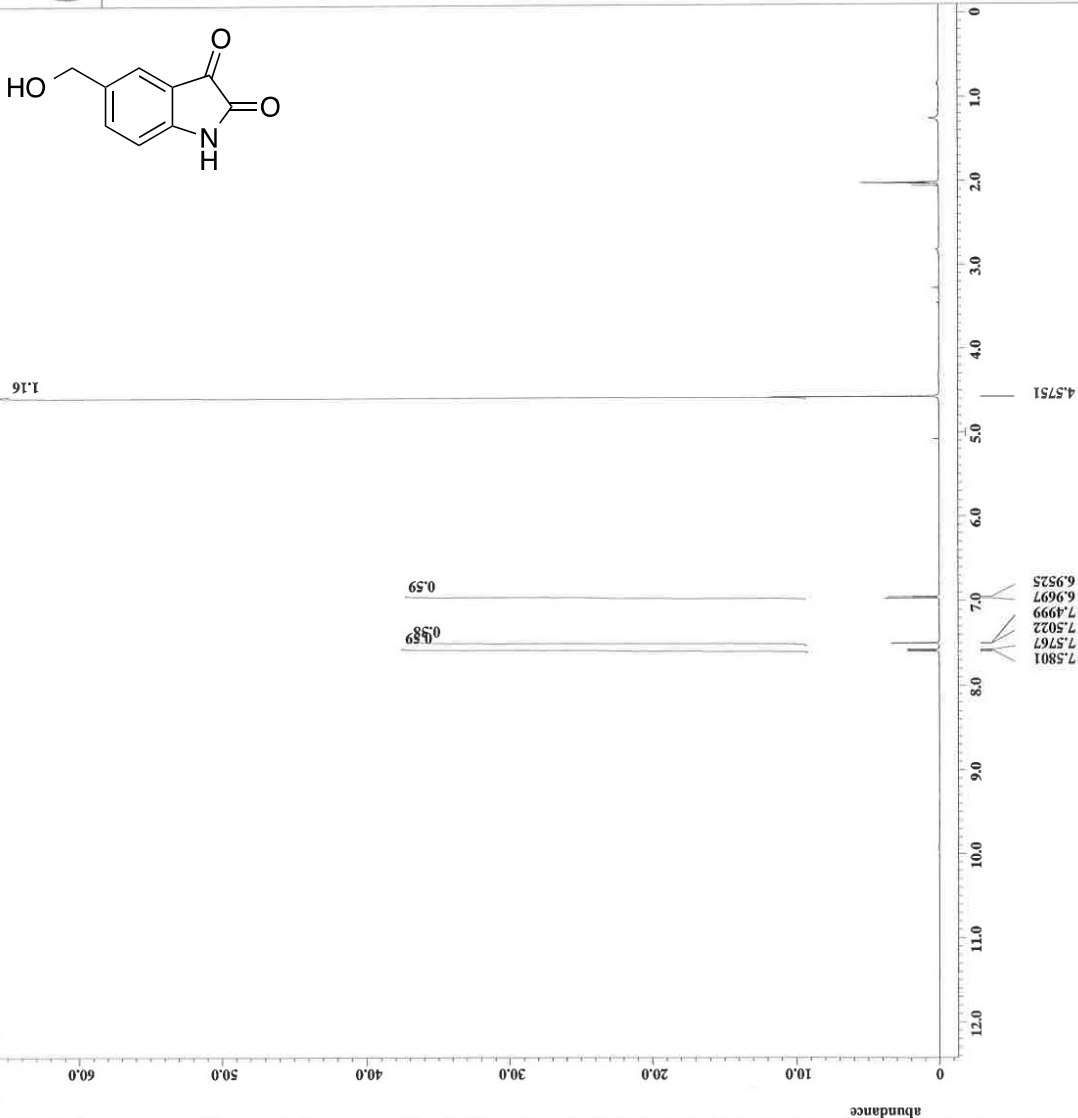

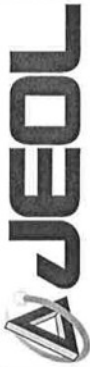

Filename = cj-3-5-2ND\_CARBON-8.j  
Author = lippert  
Experiment = single\_pulse\_dec  
Sample\_id = cj-3-5-2ND  
Solvent = DMSO  
Creation\_time = 31-JUL-2017 13:38:10  
Revision\_time = 31-JUL-2017 14:52:18  
Current\_time = 31-JUL-2017 14:52:25

Data\_format = 1D\_COMPLEX  
Dim\_size = 26214  
Dim\_time = 13C  
Dim\_freq = X  
Dimensions = X  
Site = ECA 500  
Spectrometer = DELTA2\_NMR

Field\_strength = 11.7473579[T] (500 [MHZ])  
X\_acq\_duration = 0.83361792[s]  
X\_domain = 13C  
X\_freq = 76529768 [MHz]  
X\_offset = 100.0 [ppm]  
X\_points = 32768  
X\_prescans = 4  
X\_resolution = 1.19959034 [Hz]  
X\_sweep = 39.3081761 [MHz]  
Irr\_domain = 1H  
Irr\_freq = 500.15991521 [MHz]  
Irr\_offset = 5.0 [ppm]  
Mod = WALTZ  
Mod\_return = 1  
Scans = 574  
Total\_scans = 574

X\_90\_width = 14.5 [us]  
X\_acq\_time = 0.83361792 [s]  
X\_angle = 8.5 [deg]  
X\_delay = 8.5 [us]  
X\_pulse = 4.96666667 [us]  
Irr\_atn\_dec = 21 [dB]  
Irr\_atn\_noe = 21 [dB]  
Irr\_noise = WALTZ  
Decoupling = TRUE  
Initial\_wait = 1 [s]  
Recvr\_time = 60 [s]  
Recovery\_gain = 60  
Relaxation\_delay = 2 [s]  
Repetition\_delay = 2.81361792 [s]  
Repetition\_time = 22.1 [dc]  
Temp\_get = 22.1 [dC]

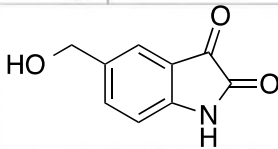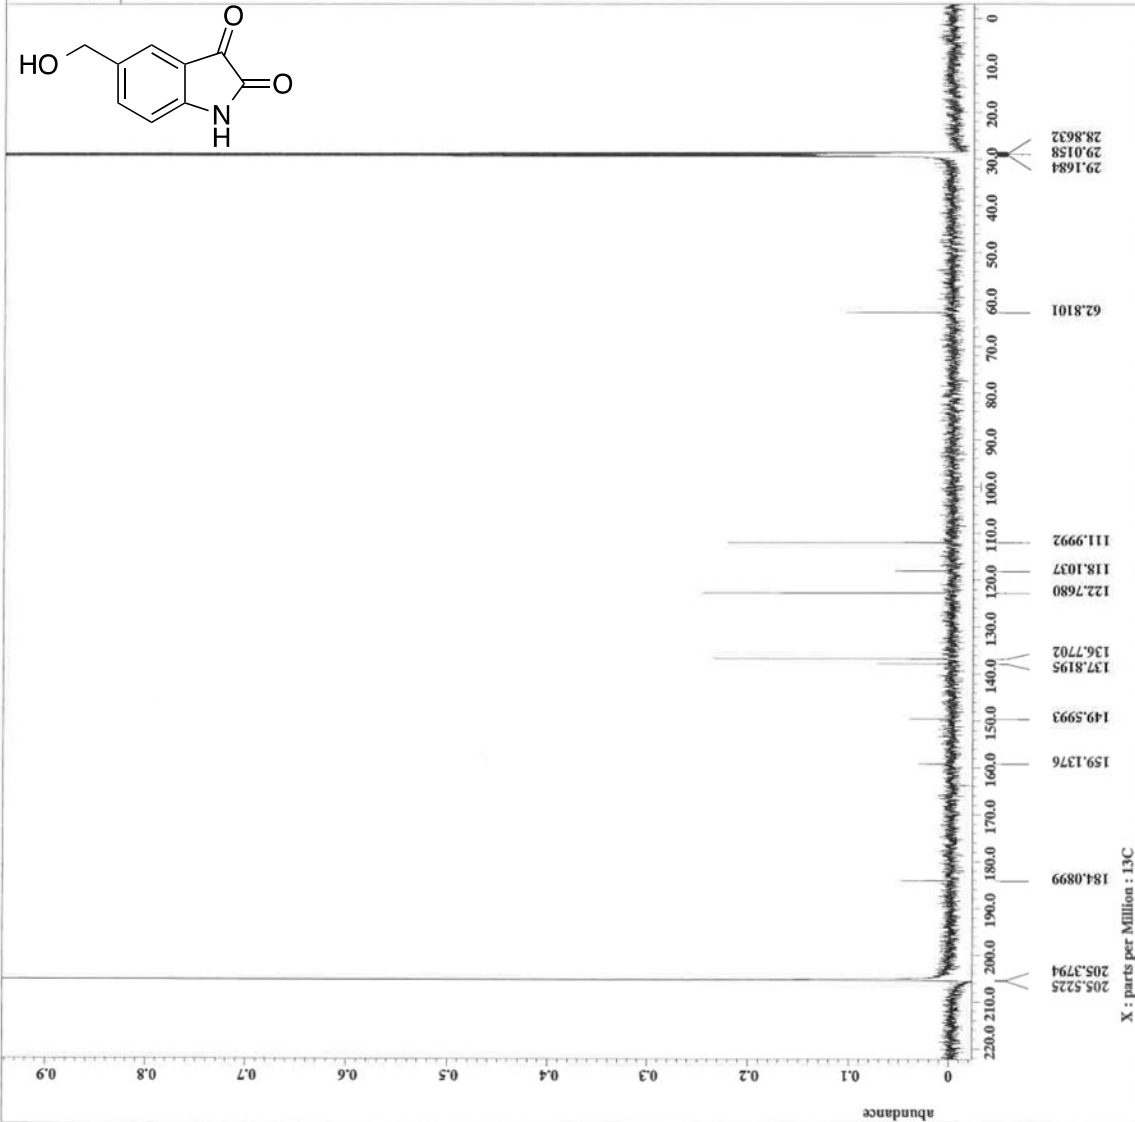





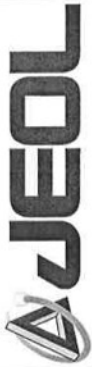

Filename = cj-111-11-F2\_CARBON-3  
Author = lippert  
Experiment = single\_pulse\_dec  
Sample\_id = cj-111-11-F2  
Date\_1 = 3-AUG-2017 19:24:28  
Date\_2 = 3-AUG-2017 20:39:32  
Revision\_time = 3-AUG-2017 20:40:19  
Current\_time = 3-AUG-2017 20:40:19  
Data\_format = 1D\_COMPLEX  
Dim\_size = 26214  
Dim\_title = 13C  
Dim\_units = [ppm]  
Dimensions = X  
Site = ECA 500  
Spectrometer = DELTA2\_NMR  
Field\_strength = 11.7473579[T] (500[MH  
X\_acq\_duration = 0.83361792[s]  
X\_domain = 13C  
X\_freq = 101.76529768[MHz]  
X\_gamma = 13  
X\_points = 32768  
X\_prescans = 4  
X\_resolution = 1.19959034[Hz]  
X\_sweep = 39.3081761[MHz]  
Irr\_domain = 1H  
Irr\_freq = 500.15991521[MHz]  
Irr\_offset = 5.0[ppm]  
Mod\_return = 1  
Mod = ADR  
Total\_scans = 1894  
X\_90\_width = 14.3[us]  
X\_acq\_time = 0.83361792[s]  
X\_angle = 30[deg]  
X\_delay = 4.96666667[us]  
X\_pulse = 4.96666667[us]  
Irr\_atn\_dec = 21[dB]  
Irr\_atn\_noe = 21[dB]  
Irr\_noise = WALZ  
Decoupling = TRUE  
Initial\_wait = 1[s]  
Roe\_time = TRUE  
Recr\_time = 6[s]  
Relaxation\_delay = 2[s]  
Repetition\_time = 2.83361792[s]  
Temp\_get = 22.3[degC]

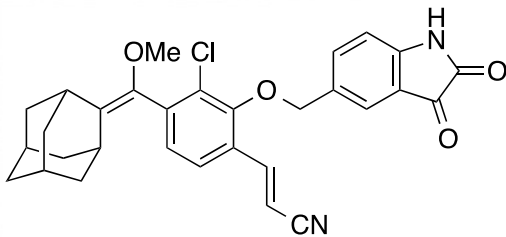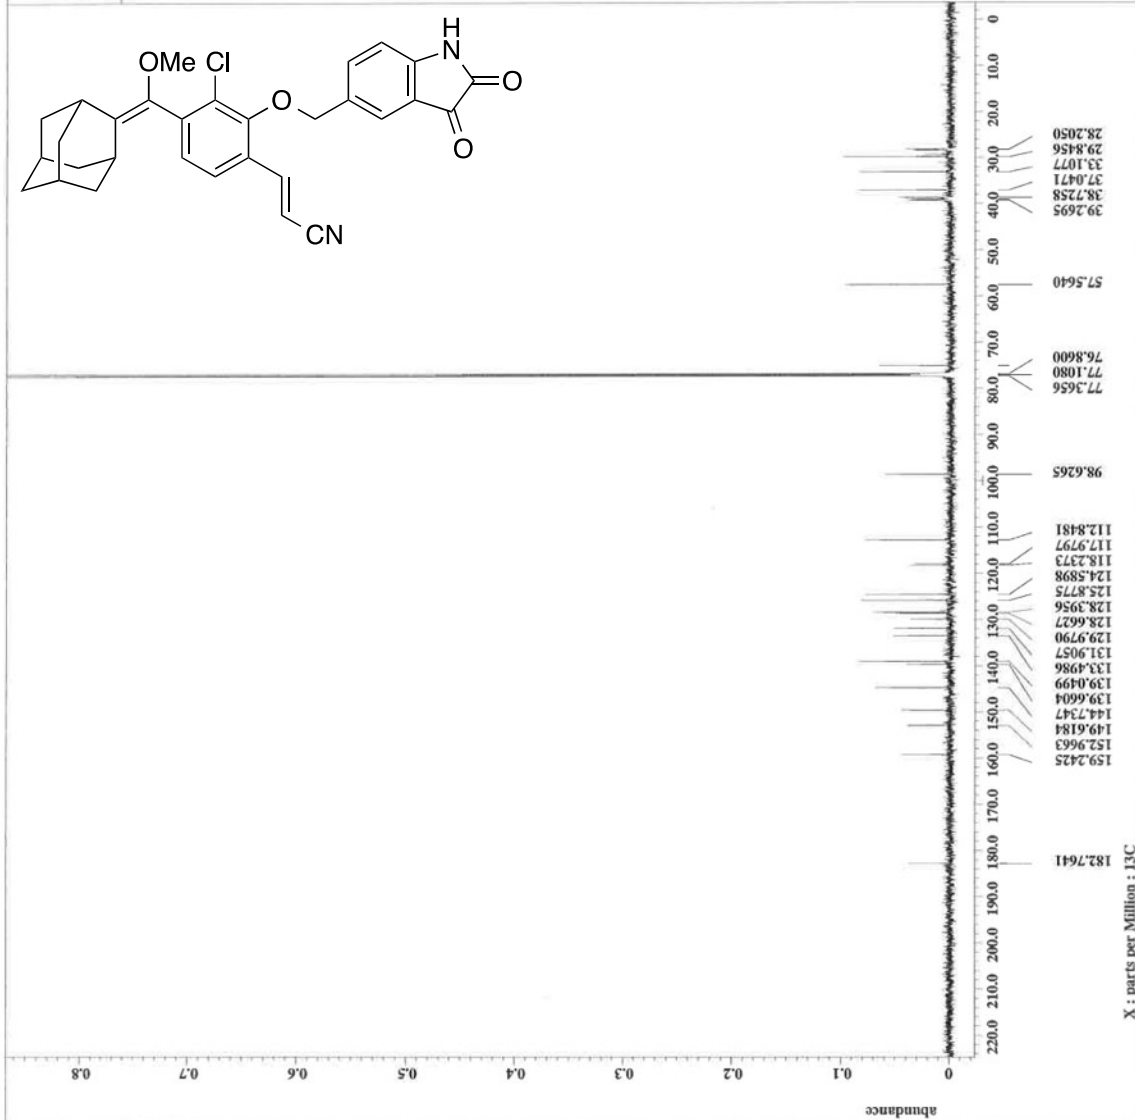

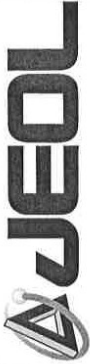

File: cj-III-61-PMCL\_PROTON  
Author: lippert  
Experiment: single\_pulse.enc2  
Sample: PMCL  
SOLVENT: CDCl3  
PULPROG: zgpg30  
CLOCKFORM: n  
Creation\_time: 25-SEP-2017 13:09:07  
Revision\_time: 13-NOV-2017 17:43:20  
Current\_time: 13-NOV-2017 17:43:47  
Data\_format: ID\_COMPLEX  
Dim\_size: 13107  
Dim\_title: 1H  
Dim\_units: Hz  
Dimensions: X  
Site: ECA 500  
Spectrometer: DELTA2\_NMR  
Field\_strength: 11.7473575 [T] (500 [MHZ])  
X\_acq\_duration: 1.74587904 [s]  
X\_domain: 1.74587904 [s]  
X\_freq: 500.15991521 [MHz]  
X\_offset: 5.0 [ppm]  
X\_points: 16384  
X\_prescans: 1  
X\_resolution: 0.5727737 [Hz]  
X\_sweep: 9.38438438 [MHz]  
Irr\_domain: 1H  
Irr\_freq: 500.15991521 [MHz]  
Irr\_offset: 5.0 [ppm]  
Irr\_points: 16384  
Irr\_prescans: 1  
Irr\_resolution: 0.5727737 [Hz]  
Irr\_sweep: 9.38438438 [MHz]  
Mod\_return: 1  
Scans: 16  
Total\_scans: 16  
X\_90\_width: 13.81 [us]  
X\_acq\_time: 1.74587904 [s]  
X\_angle: 45 [deg]  
X\_atn: 5 [dB]  
X\_pulse: 6.905 [us]  
Irr\_mode: Off  
Irr\_mode2: Off  
Dante\_preset: FALSE  
Initial\_wait: 40 [s]  
Relaxation\_delay: 4 [s]  
Repetition\_time: 5.74587904 [s]  
Temp\_get: 21.3 [dC]

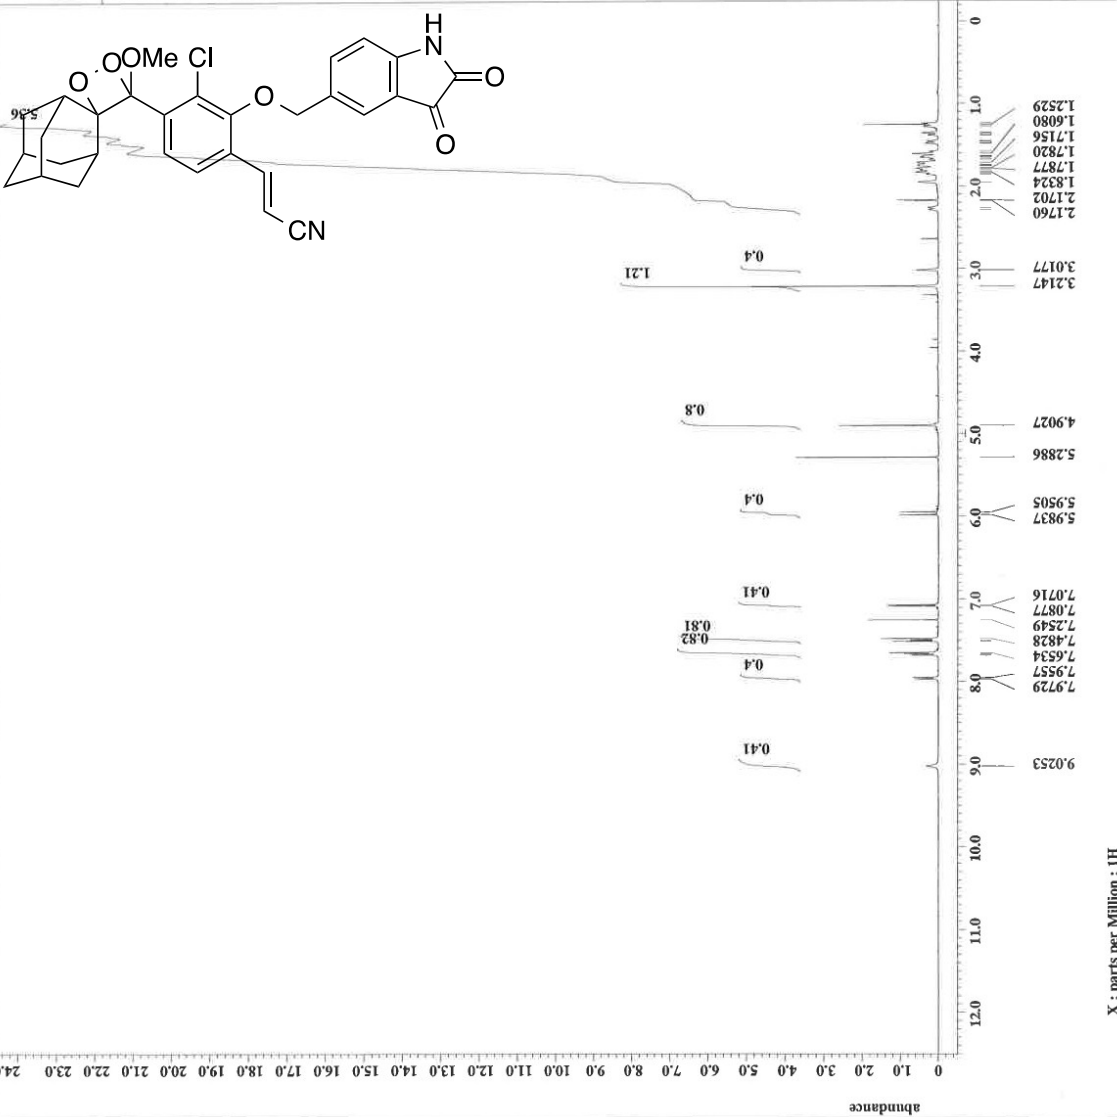

X : parts per Million : 1H

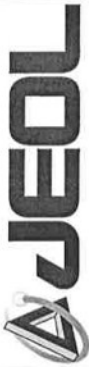

File name = c:\iii-pncl-1\_carbon-  
Author = lidpert  
Experiment = single\_pulse\_dec  
Sample\_id = 13C-1000-1  
Solvent = CDCl3  
Creation\_time = 4-AUG-2017 19:35:35  
Revision\_time = 4-AUG-2017 20:50:03  
Current\_time = 4-AUG-2017 20:50:10  
Data\_format = ID\_COMPLEX  
Dim\_size = 26214  
Dim\_unit = 13C  
Dim\_units = ppm  
Dimensions = X  
Site = ECA 500  
Spectrometer = DELTA2\_NMR  
Field\_strength = 11.7473579 [T] (500 [MH  
X\_acq\_duration = 0.83361792 [s]  
X\_domain = 13C 76529768 [MHz]  
X\_freq = 100.628120 [MHz]  
X\_offset = 32768  
X\_points = 4  
X\_prescans = 4  
X\_resolution = 1.19959034 [Hz]  
X\_sweep = 39.3081761 [MHz]  
Irr\_domain = 2H  
Irr\_freq = 500.15991521 [MHz]  
Irr\_offset = 8.0 [ppm]  
Mod\_return = 1  
Pulse = 1730  
Total\_scans = 1730  
X\_90\_width = 14.5 [us]  
X\_acq\_time = 0.83361792 [s]  
X\_angle = 8.5 [dB]  
X\_atn = 4.96666667 [us]  
X\_pulse = 21 [dB]  
Irr\_atn\_dec = 21 [dB]  
Irr\_atn\_noe = 21 [dB]  
Irr\_noise = WALZ  
Decoupling = TRUE  
Initial\_wait = 1 [s]  
Roc\_time = TRUE  
Recovery = 60 [s]  
Recovery\_gain = 60  
Relaxation\_delay = 2 [s]  
Repetition\_time = 2.81361792 [s]  
Temp\_get = 22.4 [dC]

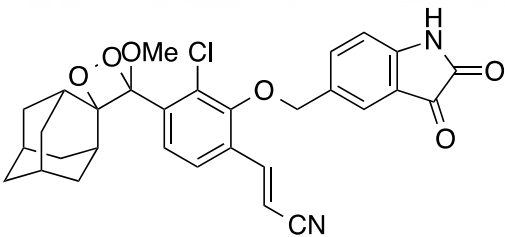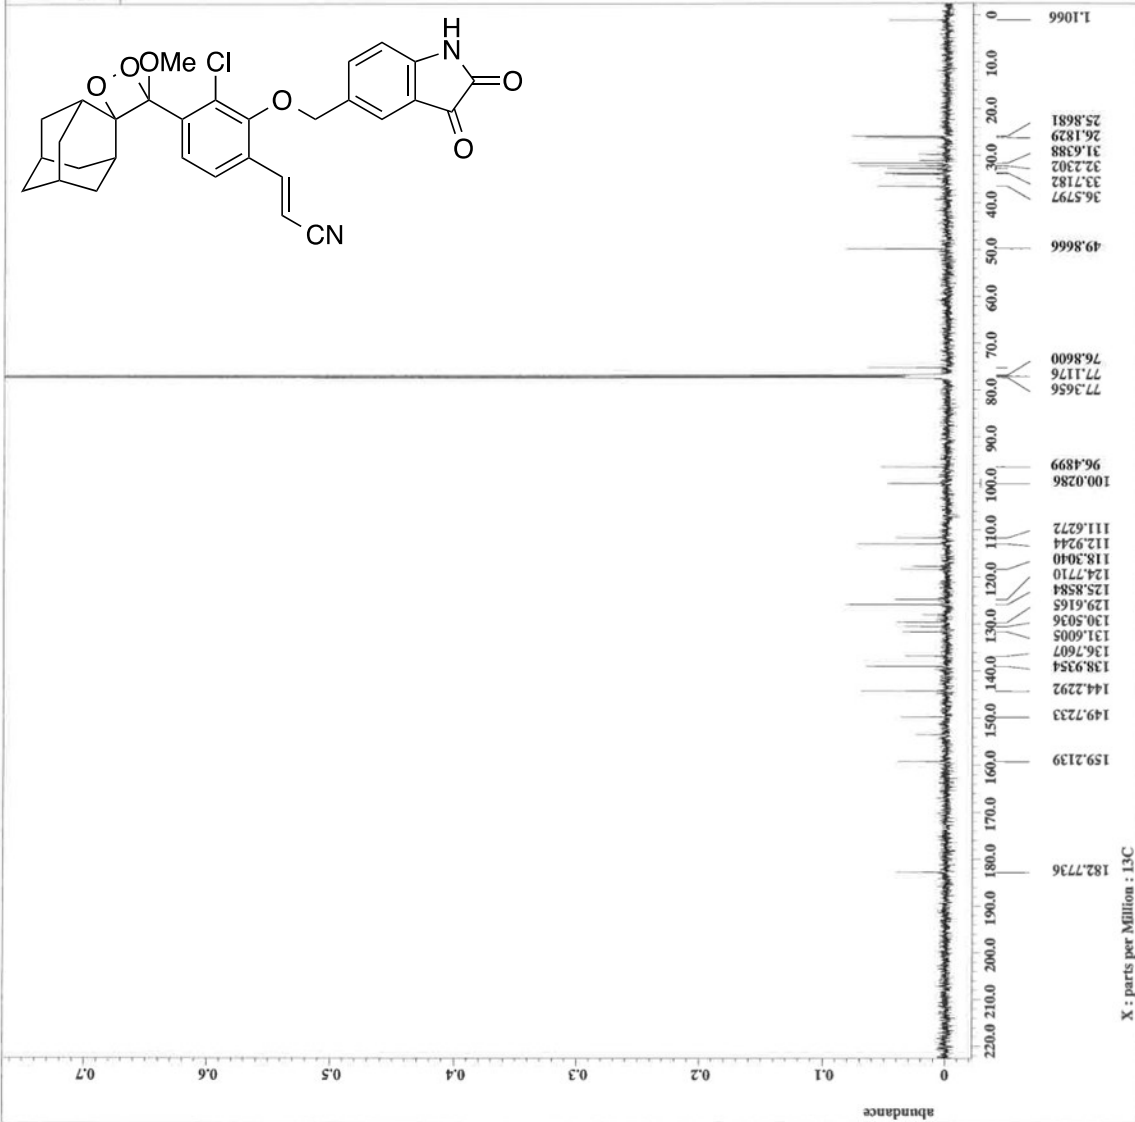

Supplement: c7sc05087a1.pdf [file c7sc05087a1.pdf]
